# Supplementary material
Source: ML conference proceedings conference paper supplement (https://proceedings.neurips.cc/paper_files/paper/2023/hash/1e118ba9ee76c20df728b42a35fb4704-Abstract.html)
Supplement: Supplementary file 1 [file 1e118ba9ee76c20df728b42a35fb4704-Supplemental-Conference.pdf]

---

# White-Box Transformers via Sparse Rate Reduction

---

Anonymous Author(s)

Affiliation

Address

email

## Abstract

In this paper, we contend that the objective of representation learning is to compress and transform the distribution of the data, say sets of tokens, towards a mixture of low-dimensional Gaussian distributions supported on incoherent subspaces. The quality of the final representation can be measured by a unified objective function called *sparse rate reduction*. From this perspective, popular deep networks such as transformers can be naturally viewed as realizing iterative schemes to optimize this objective incrementally. Particularly, we show that the standard transformer block can be derived from alternating optimization on complementary parts of this objective: the multi-head self-attention operator can be viewed as a gradient descent step to compress the token sets by minimizing their lossy coding rate, and the subsequent multi-layer perceptron can be viewed as attempting to sparsify the representation of the tokens. This leads to a family of *white-box* transformer-like deep network architectures which are mathematically fully interpretable. Despite their simplicity, experiments show that these networks indeed learn to optimize the designed objective: they compress and sparsify representations of large-scale real-world vision datasets such as ImageNet, and achieve performance very close to thoroughly engineered transformers such as ViT.

## 1 Introduction

In recent years, deep learning has been extremely successful in processing massive amounts of high-dimensional and multi-modal data. Much of this success is owed to effective learning of the data distribution and then transforming the distribution to a parsimonious, i.e. *structured and compact*, representation [39, 49, 51, 61], which facilitates many downstream tasks (e.g., in vision, classification [23, 40], recognition and segmentation [25, 38, 73], and generation [31, 64, 65]). To this end, many models and methods have been proposed and practiced, each with its own strengths and limitations. Here, we give several popular methods a brief accounting as context for a complete understanding and unification that we seek in this work.

**Transformer models and self-attention.** Transformers [28] are one of the latest popular models for learning a representation for high-dimensional structured data, such as text [28, 30, 37], images [40, 72], and other types of signals [48, 56]. After the first block, which converts each data point (such as a text corpus or image) into a set or sequence of *tokens*, further processing is performed on the token sets, in a medium-agnostic manner [28, 40]. A cornerstone of the transformer model is the so-called *self-attention layer*, which exploits the statistical correlations among the sequence of tokens to refine the token representation. Transformers have been highly successful in learning compact representations that perform well on many downstream tasks. Yet the transformer network architecture is empirically designed and lacks a rigorous mathematical interpretation. In fact, the output of the attention layer itself has several competing interpretations [67, 74]. As a result, the statistical and geometric relationship between the data distribution and the final representation learned by a transformer largely remains a mysterious black box.

**Diffusion models and denoising.** Diffusion models [22, 34, 41, 43, 44] have recently become a popular method for learning the data distribution, particularly for generative tasks and natural image data which are highly structured but notoriously difficult to effectively model [3, 5]. The core concept of diffusion models is to start with features sampled from a Gaussian noise distribution (or

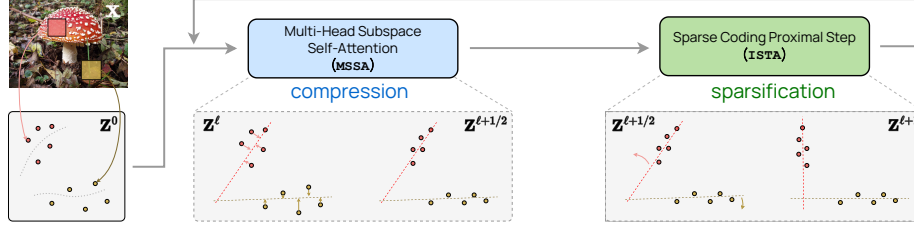

**Figure 1: The ‘main loop’ of the CRATE white-box deep network design.** After encoding input data  $X$  as a sequence of tokens  $Z^0$ , CRATE constructs a deep network that transforms the data to a canonical configuration of low-dimensional subspaces by successive **compression** against a local model for the distribution, generating  $Z^{\ell+1/2}$ , and **sparsification** against a global dictionary, generating  $Z^{\ell+1}$ . Repeatedly stacking these blocks and training the model parameters via backpropagation yields a powerful and interpretable representation of the data.

some other standard template) and *iteratively denoise* and deform the feature distribution until it converges to the original data distribution. This process is computationally intractable if modeled in just one step [60], so it is typically broken into multiple incremental steps. The key to each step is the so-called *score function*, or equivalently [13] an estimate for the “optimal denoising function”; in practice this function is modeled using a generic black-box deep network. Diffusion models have shown effectiveness at learning and sampling from the data distribution [55, 59, 64]. However, despite some recent efforts [77], they generally do not establish any clear correspondence between the initial features and data samples. Hence, diffusion models themselves do not offer a parsimonious or interpretable representation of the data distribution.

**Structure-seeking models and rate reduction.** In both of the previous two methods, the representations were constructed implicitly as a byproduct of solving a downstream task (e.g., classification or generation/sampling) using deep networks. However, one can also explicitly learn a representation of the data distribution as a task in and of itself; this is most commonly done by trying to identify and represent low-dimensional structures in the input data. Classical examples of this paradigm include model-based approaches such as sparse coding [2, 29] and dictionary learning [17, 21, 47], out of which grew early attempts at designing and interpreting deep network architectures [18, 32]. More recent approaches build instead from a model-free perspective, where one learns a representation through a sufficiently-informative pretext task (such as compressing similar and separating dissimilar data in contrastive learning [45, 68, 76], or maximizing the information gain in the class of maximal coding rate reduction methods [6, 46, 54]). Compared to black-box deep learning approaches, both model-based and model-free representation learning schemes have the advantage of being more interpretable: they allow users to explicitly design desired properties of the learned representation [46, 54, 62]. Furthermore, they allow users to construct new white-box forward-constructed deep network architectures [11, 54, 58] by *unrolling the optimization strategy for the representation learning objective*, such that each layer of the constructed network implements an iteration of the optimization algorithm [11, 52, 54]. Unfortunately, in this paradigm, if the desired properties are narrowly defined, it may be difficult to achieve good practical performance on large real-world datasets.

**Our contributions, and outline of this work.** In this work, we aim to remedy the limitations of these existing methods with a more unified framework for designing transformer-like network architectures that leads to both mathematical interpretability and good practical performance. To this end, we propose to learn a sequence of *incremental mappings* to obtain a most *compressed and sparse* representation for the input data (or their token sets) that optimizes a *unified objective function* known as the sparse rate reduction, specified later in (1). The goal of the mapping is illustrated in Figure 1. Within this framework, we unify the above three seemingly disparate approaches and show that *transformer-like deep network layers can be naturally derived from unrolling iterative optimization schemes to incrementally optimize the sparse rate reduction objective*. In particular, our contributions and outline of the paper are as follows:

- In Section 2.2 we show, using an idealized model for the token distribution, that if one *iteratively denoises* the tokens towards a family of low-dimensional subspaces, the associated score function assumes an explicit form similar to a self-attention operator seen in transformers.
- In Section 2.3 we derive the multi-head self-attention layer as an unrolled gradient descent step to minimize the lossy coding rate part of the rate reduction, showing another interpretation of the self-attention layer as compressing the token representation.
- In Section 2.4 we show that the multi-layer perceptron which immediately follows the multi-head self-attention in transformer blocks can be interpreted as (and replaced by) a layer which

incrementally optimizes the remaining part of the sparse rate reduction objective by constructing a sparse coding of the token representations.

- In Section 2.5 we use this understanding to create a new white-box (fully mathematically interpretable) transformer architecture called CRATE (i.e., Coding RAtE reduction TransformEr), where each layer performs a *single step* of an alternating minimization algorithm to optimize the sparse rate reduction objective.

Hence, within our framework, the learning objective function, the deep learning architecture, and the final learned representation *all become white boxes* that are fully mathematically interpretable. As the experiments in Section 3 show, the CRATE networks, despite being simple, can already learn the desired compressed and sparse representations on large-scale real-world datasets and achieve performance on par with much more heavily engineered transformer networks (such as ViT) on a wide variety of tasks (e.g., classification and transfer learning).

## 2 Technical Approach and Justification

### 2.1 Objective and Approach

We consider a general learning setup associated with real-world signals. We have some random variable  $\mathbf{X} = [\mathbf{x}_1, \dots, \mathbf{x}_N] \in \mathbb{R}^{D \times N}$  which is our data source; each  $\mathbf{x}_i \in \mathbb{R}^D$  is interpreted as a *token*<sup>1</sup>, and the  $\mathbf{x}_i$ 's may have arbitrary correlation structures. We use  $\mathbf{Z} = [\mathbf{z}_1, \dots, \mathbf{z}_N] \in \mathbb{R}^{d \times N}$  to denote the random variable which defines our representations. Each  $\mathbf{z}_i \in \mathbb{R}^d$  is the representation of the corresponding token  $\mathbf{x}_i$ . We are given  $B \geq 1$  i.i.d. samples  $\mathbf{X}_1, \dots, \mathbf{X}_B \sim \mathbf{X}$ , whose tokens are  $\mathbf{x}_{i,b}$ . The representations of our samples are denoted  $\mathbf{Z}_1, \dots, \mathbf{Z}_B \sim \mathbf{Z}$ , and those of our tokens are  $\mathbf{z}_{i,b}$ . Finally, for a given network, we use  $\mathbf{Z}^\ell$  to denote the output of the first  $\ell$  layers when given  $\mathbf{X}$  as input. Correspondingly, the sample outputs are  $\mathbf{Z}_i^\ell$  and the token outputs are  $\mathbf{z}_{i,b}^\ell$ .

**Objective for learning a structured and compact representation.** Following the framework of rate reduction [54], we contend that the goal of representation learning is to find a feature mapping  $f: \mathbf{X} \in \mathbb{R}^{D \times N} \rightarrow \mathbf{Z} \in \mathbb{R}^{d \times N}$  which transforms input data  $\mathbf{X} \in \mathbb{R}^{D \times N}$  with a potentially nonlinear and multi-modal distribution to a (piecewise) *linearized and compact* feature representation  $\mathbf{Z} \in \mathbb{R}^{d \times N}$ . While the joint distribution of tokens  $(\mathbf{z}_i)_{i=1}^N$  in  $\mathbf{Z}$  may be sophisticated (and task-specific), we further contend that it is reasonable and practical to require that the target marginal distribution of individual tokens  $\mathbf{z}_i$  should be highly compressed and structured, amenable for compact coding. Particularly, we require the distribution to be a *mixture of low-dimensional (say  $K$ ) Gaussian distributions*, such that the  $k^{\text{th}}$  Gaussian has mean  $\mathbf{0} \in \mathbb{R}^d$ , covariance  $\Sigma_k \succ \mathbf{0} \in \mathbb{R}^{d \times d}$ , and support spanned by the orthonormal basis  $\mathbf{U}_k \in \mathbb{R}^{d \times p}$ . We denote  $\mathbf{U}_{[K]} = (\mathbf{U}_k)_{k=1}^K$  to be the set of bases of all Gaussians. Hence to maximize the *information gain* [61] for the final token representation, we wish to maximize the rate reduction [6, 46] of the tokens, i.e.,  $\max_{\mathbf{Z}} \Delta R(\mathbf{Z}; \mathbf{U}_{[K]}) = R(\mathbf{Z}) - R^c(\mathbf{Z}; \mathbf{U}_{[K]})$ , where  $R$  and  $R^c$  are estimates of lossy coding rates to be formally defined in (7) and (8). This also promotes token representations  $\mathbf{z}_i$  from different Gaussians to be *incoherent* [46]. Since rate reduction is an intrinsic measure of goodness for the representation, it is invariant to arbitrary rotations of the representations. Therefore, to ensure the final representations are amenable to more compact coding, we would like to transform the representations (and their supporting subspaces) so that they become *sparse* with respect to the standard coordinates of the resulting representation space.<sup>2</sup> The combined rate reduction and sparsification process is illustrated in Figure 1. Computationally, we may combine the above two goals into a unified objective for optimization:

$$\max_{f \in \mathcal{F}} \mathbb{E}_{\mathbf{Z}} [\Delta R(\mathbf{Z}; \mathbf{U}_{[K]}) - \lambda \|\mathbf{Z}\|_0] = \max_{f \in \mathcal{F}} \mathbb{E}_{\mathbf{Z}} [R(\mathbf{Z}) - R^c(\mathbf{Z}; \mathbf{U}_{[K]}) - \lambda \|\mathbf{Z}\|_0] \text{ s.t. } \mathbf{Z} = f(\mathbf{X}), \quad (1)$$

where the  $\ell^0$  norm  $\|\mathbf{Z}\|_0$  promotes the sparsity of the final token representations  $\mathbf{Z} = f(\mathbf{X})$ .<sup>3</sup> We call this objective “*sparse rate reduction*.”

**White-box deep architecture as unrolled incremental optimization.** Although easy to state, each term of the above objective can be computationally very challenging to optimize [54, 69]. Hence it is natural to take an approximation approach that realizes the global transformation  $f$  optimizing (1) through a concatenation of multiple, say  $L$ , simple *incremental and local* operations  $f^\ell$  that push the representation distribution towards the desired parsimonious model distribution:

<sup>1</sup>For language transformers, tokens roughly correspond to words [28], while for vision transformers, tokens correspond to image patches [40].

<sup>2</sup>That is, having the fewest nonzero entries.

<sup>3</sup>To simplify the notation, we will discuss the objective for one sample  $\mathbf{X}$  at a time with the understanding that we always mean to optimize the expectation.

$$f: \mathbf{X} \xrightarrow{f^0} \mathbf{Z}^0 \rightarrow \dots \rightarrow \mathbf{Z}^\ell \xrightarrow{f^\ell} \mathbf{Z}^{\ell+1} \rightarrow \dots \rightarrow \mathbf{Z}^L = \mathbf{Z}, \quad (2)$$

where  $f^0: \mathbb{R}^D \rightarrow \mathbb{R}^d$  is the pre-processing mapping that transforms input tokens  $\mathbf{x}_i \in \mathbb{R}^D$  to their token representations  $\mathbf{z}_i^1 \in \mathbb{R}^d$ . Each incremental *forward mapping*  $\mathbf{Z}^{\ell+1} = f^\ell(\mathbf{Z}^\ell)$ , or a “layer”, transforms the token distribution to *optimize* the above sparse rate reduction objective (1), conditioned on the distribution of its input tokens  $\mathbf{Z}^\ell$ . The distribution of  $\mathbf{Z}^\ell$  can be explicitly modeled or approximated, say as a mixture of linear subspaces or sparsely generated from a dictionary, with parameters learned from data (say via *backward propagation* with end-to-end training).<sup>4</sup>

We show that we can derive these incremental, local operations through an unrolled optimization perspective to achieve (1) through Sections 2.3 to 2.5. Once we decide on using an incremental approach to optimizing (1), there are a variety of possible choices to achieve the optimization. Given a model for  $\mathbf{Z}^\ell$ , say a mixture of subspaces  $\mathbf{U}_{[K]}$ , we opt for a two-step *alternating minimization* process with a strong conceptual basis: first in Section 2.3, we *compress* the tokens  $\mathbf{Z}^\ell$  via a gradient step to minimize the coding rate term  $\min_{\mathbf{Z}} R^c(\mathbf{Z}; \mathbf{U}_{[K]})$ ; second, in Section 2.4, we *sparsify* the compressed tokens, with a suitably-relaxed proximal gradient step on the difference of the sparsity penalty and the expansion term, i.e.,  $\min_{\mathbf{Z}} [\lambda \|\mathbf{Z}\|_0 - R(\mathbf{Z})]$ . Both actions are applied incrementally and repeatedly, as each  $f^\ell$  in (2) is instantiated with these two steps.

## 2.2 Self-Attention via Denoising Tokens Towards Multiple Subspaces

There are many different ways to optimize the objective (1) incrementally. In this work, we propose arguably *the most basic* scheme. To help clarify the intuition behind our derivation and approximation, in this section (and Appendix A.1) we study a largely idealized model which nevertheless captures the essence of nearly the whole process and particularly reveals the reason why self-attention-like operators arise in many contexts. Assume that  $N = 1$ , and the single token  $\mathbf{x}$  is drawn i.i.d. from an unknown mixture of Gaussians  $(\mathcal{N}(\mathbf{0}, \Sigma_k))_{k=1}^K$  supported on low-dimensional subspaces with orthonormal bases  $\mathbf{U}_{[K]} = (\mathbf{U}_k)_{k=1}^K$  and corrupted with additive Gaussian noise  $\mathbf{w} \sim \mathcal{N}(\mathbf{0}, \mathbf{I})$ , i.e.,

$$\mathbf{x} = \mathbf{z} + \sigma \mathbf{w}, \quad (3)$$

where  $\mathbf{z}$  is distributed according to the mixture. Our goal is simply to transform the distribution of the noisy token  $\mathbf{x}$  to the mixture of low-dimensional Gaussians  $\mathbf{z}$ . Towards incremental construction of a representation  $f$  for this model following (2), we reason inductively: if  $\mathbf{z}^\ell$  is a noisy token (3) at noise level  $\sigma^\ell$ , it is natural to produce  $\mathbf{z}^{\ell+1}$  by denoising at the level  $\sigma^\ell$ . In the mean-square sense, the optimal estimate is  $\mathbb{E}[\mathbf{z} | \mathbf{z}^\ell]$ , which has a variational characterization (e.g. [12]):

$$\mathbb{E}[\mathbf{z} | \cdot] = \arg \min_f \mathbb{E}_{\mathbf{z}, \mathbf{w}} [\|f(\mathbf{z} + \sigma^\ell \mathbf{w}) - \mathbf{z}\|_2^2]. \quad (4)$$

Setting  $\mathbf{z}^{\ell+1} = \mathbb{E}[\mathbf{z} | \mathbf{z}^\ell]$ , (4) thus characterizes the next stage of (2) in terms of an optimization objective based on a *local signal model* for  $\mathbf{z}^\ell$ . Moreover, letting  $\mathbf{x} \mapsto q^\ell(\mathbf{x})$  denote the density of  $\mathbf{z}^\ell$ , Tweedie’s formula [13] allows us to express the optimal representation solving (4) in closed-form:

$$\mathbf{z}^{\ell+1} = \mathbf{z}^\ell + (\sigma^\ell)^2 \nabla_{\mathbf{x}} \log q^\ell(\mathbf{z}^\ell). \quad (5)$$

Tweedie’s formula expresses the optimal representation in terms of an additive correction (in general a nonlinear function of  $\mathbf{z}^\ell$ ) to the noisy observations by the gradient of the *log-likelihood* of the distribution of the noisy observations, giving the optimal representation a clear interpretation as an incremental perturbation to the current noisy distribution  $q^\ell$ . This connection is well-known in the areas of estimation theory and inverse problems [1, 13, 14, 19, 20, 27, 42], and more recently has found powerful applications in the training of generative models for natural images [4, 15, 22, 43, 44]. Here, we can calculate a closed-form expression for this *score function*  $\nabla_{\mathbf{x}} \log q^\ell$ , which, when combined with (5) and some technical assumptions<sup>5</sup>, gives the following approximation (shown in Appendix A.1). Let  $\otimes$  denote the Kronecker product; then we have

$$\mathbf{z}^{\ell+1} \approx [\mathbf{U}_1, \dots, \mathbf{U}_K] \left[ \text{diag} \left( \text{softmax} \left( \frac{1}{2(\sigma^\ell)^2} \begin{bmatrix} \|\mathbf{U}_1^* \mathbf{z}^\ell\|_2^2 \\ \vdots \\ \|\mathbf{U}_K^* \mathbf{z}^\ell\|_2^2 \end{bmatrix} \right) \right) \otimes \mathbf{I}_p \right] \begin{bmatrix} \mathbf{U}_1^* \mathbf{z}^\ell \\ \vdots \\ \mathbf{U}_K^* \mathbf{z}^\ell \end{bmatrix}, \quad (6)$$

<sup>4</sup>This separation of forward “optimization” and backward “learning” clarifies the mathematical role of each layer as an operator transforming the distribution of its input, whereas the input distribution is in turn modeled by the parameters of the layer.

<sup>5</sup>Such as  $\sigma$  being smaller than the nonzero eigenvalues of  $\Sigma_k$  and the normalization assumption  $\pi_i \det(\Sigma_i + \sigma^2 \mathbf{I})^{-1/2} = \pi_j \det(\Sigma_j + \sigma^2 \mathbf{I})^{-1/2}$  for all  $i, j \in [K]$ , where  $\pi_k$  is the mixture proportion for the  $k^{\text{th}}$  Gaussian.

This operation resembles a self-attention layer in a standard transformer architecture with  $K$  heads, sequence length  $N = 1$ , the “query-key-value” constructs being replaced by a single linear projection  $U_k^* z^\ell$  of the token  $z^\ell$ , and the aggregation of head outputs (conventionally modeled by an MLP) done with the two leftmost matrices in (6). We thus derive the following useful interpretation, which we will exploit in the sequel: *Gaussian denoising against a mixture of subspaces model leads to self-attention-type layers in the transformation  $f$ .* Given an initial sample  $x$  following the model (3), we can repeatedly apply local transformations to the distribution with (6) in order to realize the incremental mapping  $f: x \rightarrow z$  in (2).<sup>6</sup> These insights will guide us in the design of our white-box transformer architecture in the upcoming subsections.

### 2.3 Self-Attention via Compressing Token Sets through Optimizing Rate Reduction

In the last subsection, we have seen that the multi-head attention in a transformer resembles the score-matching operator that aims to transform a token  $z^\ell$  towards a mixture of subspaces (or degenerate Gaussians). Nevertheless, to carry out such an operation on any data, one needs to first learn or estimate, typically from finite samples, the parameters of the mixture of (degenerate) Gaussians, which is known to be a challenging task [6, 24]. This challenge is made even harder because in a typical learning setting, the given set of tokens are *not* i.i.d. samples from the mixture of subspaces. The joint distribution among these tokens can encode rich information about the data—for example, co-occurrences between words or object parts in language and image data (resp.)—which we should also learn. Thus, we should compress / denoise / transform such a set of tokens together. To this end, we need a measure of quality, i.e., compactness, for the resulting representation of the set of tokens. A natural measure of the compactness of such a set of tokens is the (lossy) coding rate to encode them up to a certain precision  $\epsilon > 0$  [6, 46]. For a zero-mean Gaussian, this measure takes a closed form. If we view the tokens in  $Z \in \mathbb{R}^{d \times N}$  as drawn from a single zero-mean Gaussian, an estimate of their (lossy) coding rate, subject to quantization precision  $\epsilon > 0$ , is given in [6] as:

$$R(Z) \doteq \frac{1}{2} \log \det \left( I + \frac{d}{N\epsilon^2} Z^* Z \right) = \frac{1}{2} \log \det \left( I + \frac{d}{N\epsilon^2} Z Z^* \right). \quad (7)$$

In practice, the data distribution is typically multi-modal, say an image set consisting of many classes or a collection of image patches as in Figure 1. It is more appropriate to require that the set of tokens map to a mixture of, say  $K$ , subspaces (degenerate Gaussians) [54]. As before we denote the (to be learned) bases of these subspaces as  $U_{[K]} = (U_k)_{k=1}^K$ , where  $U_k \in \mathbb{R}^{d \times p}$ . Although the joint distribution of the tokens  $Z$  is unknown, the desired marginal distribution of each token  $z_i$  is a mixture of subspaces. So we may obtain an upper bound of the coding rate for the token set  $Z$  by projecting its tokens onto these subspaces and summing up the respective coding rates:

$$R^c(Z; U_{[K]}) = \sum_{k=1}^K R(U_k^* Z) = \frac{1}{2} \sum_{k=1}^K \log \det \left( I + \frac{p}{N\epsilon^2} (U_k^* Z)^* (U_k^* Z) \right). \quad (8)$$

We would like to compress (or denoise) the set of tokens against these subspaces by minimizing the coding rate. The gradient of  $R^c(Z; U_{[K]})$  is

$$\nabla_Z R^c(Z; U_{[K]}) = \frac{p}{N\epsilon^2} \sum_{k=1}^K U_k U_k^* Z \left( I + \frac{p}{N\epsilon^2} (U_k^* Z)^* (U_k^* Z) \right)^{-1}. \quad (9)$$

The above expression approximates the residual of each projected token  $U_k^* z_i$  regressed by other tokens  $U_k^* z_j$  [54]. But, differently from [54], not all tokens in  $Z$  are from the same subspace. Hence, to denoise each token with tokens from its own group, we can compute their similarity through an auto-correlation among the projected tokens as  $(U_k^* Z)^* (U_k^* Z)$  and convert it to a distribution of membership with a softmax, namely  $\text{softmax}((U_k^* Z)^* (U_k^* Z))$ . Then, as we show in Appendix A.2, if we only use similar tokens to regress and denoise each other, then a gradient step on the coding rate with learning rate  $\kappa$  can be naturally approximated as follows:

$$Z^{\ell+1/2} = Z^\ell - \kappa \nabla_Z R^c(Z^\ell; U_{[K]}) \approx \left( 1 - \kappa \cdot \frac{p}{N\epsilon^2} \right) Z^\ell + \kappa \cdot \frac{p}{N\epsilon^2} \cdot \text{MSSA}(Z^\ell \mid U_{[K]}), \quad (10)$$

where MSSA is defined through an SSA operator as:

$$\text{SSA}(Z \mid U_k) \doteq (U_k^* Z) \text{softmax}((U_k^* Z)^* (U_k^* Z)), \quad k \in [K], \quad (11)$$

<sup>6</sup>This statement can be made mathematically rigorous by exploiting a deep connection between neural ODEs and diffusion models, following ideas in Song et al. [44] and Chen et al. [70].

$$\text{MSSA}(\mathbf{Z} \mid \mathbf{U}_{[K]}) \doteq \frac{p}{N\epsilon^2} \cdot [\mathbf{U}_1, \dots, \mathbf{U}_K] \begin{bmatrix} \text{SSA}(\mathbf{Z} \mid \mathbf{U}_1) \\ \vdots \\ \text{SSA}(\mathbf{Z} \mid \mathbf{U}_K) \end{bmatrix}. \quad (12)$$

Here the SSA operator in (11) resembles the *attention operator* in a typical transformer [28], except that here the linear operators of value, key, and query are all set to be *the same* as the subspace basis, i.e.,  $\mathbf{V} = \mathbf{K} = \mathbf{Q} = \mathbf{U}_k^*$ .<sup>7</sup> Hence, we name  $\text{SSA}(\cdot \mid \mathbf{U}_k) : \mathbb{R}^{d \times N} \rightarrow \mathbb{R}^{p \times N}$  the Subspace Self-Attention (SSA) operator (more details and justification can be found in (71) in Appendix A.2). Then, the whole MSSA operator in (12), formally defined as  $\text{MSSA}(\cdot \mid \mathbf{U}_{[K]}) : \mathbb{R}^{d \times N} \rightarrow \mathbb{R}^{d \times N}$  and called the Multi-Head Subspace Self-Attention (MSSA) operator, aggregates the attention head outputs by averaging using model-dependent weights, similar in concept to the popular multi-head self-attention operator in existing transformer networks. The overall gradient step (10) resembles the multi-head self-attention implemented with a skip connection in transformers.

Notice that if we have  $N = 1$  tokens as well as take an aggressive gradient step ( $\kappa = 1$ ) and tune the quantization error ( $\epsilon = \sqrt{p/N}$ ), the multi-head subspace self-attention operator in (12) becomes the ideal denoiser defined in (6), with the one minor difference that the aggregation of the heads is done by a linear function here, while in (6) it is done by a nonlinear mixture-of-experts type function.<sup>8</sup> This provides two very related interpretations of the multi-head self-attention operator, as denoising and compression against a mixture of low-dimensional subspaces.

## 2.4 MLP via Iterative Shrinkage-Thresholding Algorithms (ISTA) for Sparse Coding

In the previous subsection, we focused on how to compress a set of tokens against a set of (learned) low-dimensional subspaces. Optimizing the remaining terms in the sparse rate reduction objective (1), including the non-smooth term, serves to sparsify the compressed tokens, hence leading to a more compact and structured (i.e., *parsimonious*) representation. From (1) and (7), this term is

$$\max_{\mathbf{Z}} [R(\mathbf{Z}) - \lambda \|\mathbf{Z}\|_0] = \min_{\mathbf{Z}} \left[ \lambda \|\mathbf{Z}\|_0 - \frac{1}{2} \log \det \left( \mathbf{I} + \frac{d}{N\epsilon^2} \mathbf{Z}^* \mathbf{Z} \right) \right], \quad (13)$$

where  $R(\mathbf{Z})$  denotes the coding rate of the whole token set, as defined in (7). In addition to sparsification via the  $\|\mathbf{Z}\|_0$  term, the expansion term  $R(\mathbf{Z})$  in (13) promotes diversity and non-collapse of the representation, a highly desirable property. However, prior work has struggled to realize this benefit on large-scale datasets due to poor scalability of the gradient  $\nabla_{\mathbf{Z}} R(\mathbf{Z})$ , which requires a matrix inverse [54].

To simplify things, we therefore take a different approach to trading off between representational diversity and sparsification: we posit a (complete) incoherent or orthogonal dictionary  $\mathbf{D} \in \mathbb{R}^{d \times d}$ , and ask to sparsify the intermediate iterates  $\mathbf{Z}^{\ell+1/2}$  with respect to  $\mathbf{D}$ . That is,  $\mathbf{Z}^{\ell+1/2} = \mathbf{D}\mathbf{Z}^{\ell+1}$  where  $\mathbf{Z}^{\ell+1}$  is more sparse. The dictionary  $\mathbf{D}$  is global, i.e., is used to sparsify all tokens simultaneously. By the incoherence assumption, we have  $\mathbf{D}^* \mathbf{D} \approx \mathbf{I}_d$ ; thus from (7) we have  $R(\mathbf{Z}^{\ell+1}) \approx R(\mathbf{D}\mathbf{Z}^{\ell+1/2}) = R(\mathbf{Z}^{\ell+1/2})$ . Thus we approximately solve (13) with the following program:

$$\min_{\mathbf{Z}^{\ell+1}} \|\mathbf{Z}^{\ell+1}\|_0 \quad \text{subject to} \quad \mathbf{Z}^{\ell+1/2} = \mathbf{D}\mathbf{Z}^{\ell+1}. \quad (14)$$

The above sparse representation program is usually solved by relaxing it to an unconstrained convex program, known as LASSO:  $\min_{\mathbf{Z}^{\ell+1}} [\lambda \|\mathbf{Z}^{\ell+1}\|_1 + \|\mathbf{Z}^{\ell+1/2} - \mathbf{D}\mathbf{Z}^{\ell+1}\|_F^2]$ . In our implementation, motivated by Sun et al. [33] and Zarka et al. [35], we also add a non-negative constraint to  $\mathbf{Z}^{\ell+1}$ ,

$$\mathbf{Z}^{\ell+1} = \arg \min_{\mathbf{Z} \geq 0} [\lambda \|\mathbf{Z}\|_1 + \|\mathbf{Z}^{\ell+1/2} - \mathbf{D}\mathbf{Z}\|_F^2], \quad (15)$$

which we then incrementally optimize by performing an unrolled proximal gradient descent step, known as an ISTA step [8], to give the update:

$$\mathbf{Z}^{\ell+1} = \text{ReLU}(\mathbf{Z}^{\ell+1/2} + \eta \mathbf{D}^* (\mathbf{Z}^{\ell+1/2} - \mathbf{D}\mathbf{Z}^{\ell+1/2}) - \eta \lambda \mathbf{1}) \doteq \text{ISTA}(\mathbf{Z}^{\ell+1/2} \mid \mathbf{D}). \quad (16)$$

In Appendix A.3, we will show one can arrive at a similar operator to the above ISTA-like update for optimizing (13) by properly linearizing and approximating the rate term  $R(\mathbf{Z})$ .

## 2.5 The Overall White-Box CRATE Architecture

By combining the above two steps:

<sup>7</sup>We note a recent suggestion of Hinton [50] that it is more sensible to set the “value, key, and query” projection matrices in a transformer to be equal. Our derivation in this section confirms this mathematically.

<sup>8</sup>This suggests that we could also consider such a mixture of expert type aggregation of the multiple attention heads. In this work, we use linear aggregation, and leave evaluation of more variants for future work.

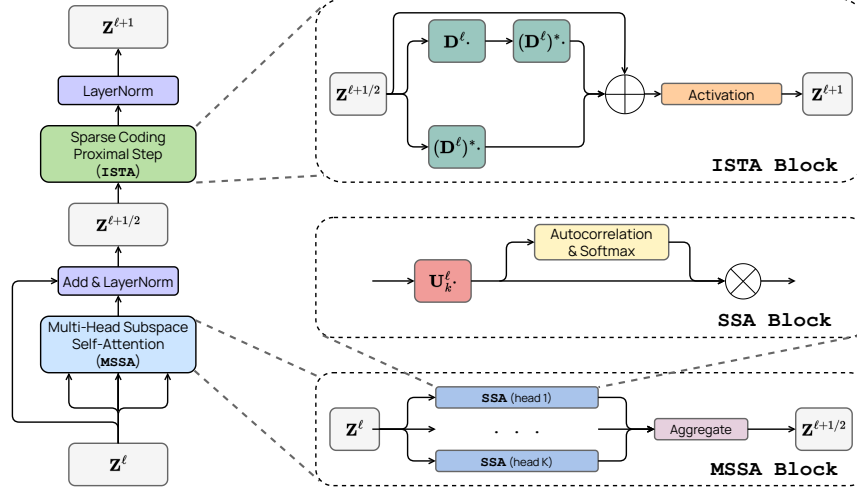

**Figure 2:** One layer of the CRATE architecture. The full architecture is simply a concatenation of such layers, with some initial tokenizer and final task-specific architecture (i.e., a classification head).

1. (Sections 2.2 and 2.3) Local denoising and compression of tokens within a sample towards a mixture-of-subspace structure, leading to the multi-head subspace self-attention block – MSSA;
  2. (Section 2.4) Global compression and sparsification of token sets across all samples through sparse coding, leading to the sparsification block – ISTA;
- we can get the following rate-reduction-based transformer layer, illustrated in Figure 2,

$$\mathbf{Z}^{\ell+1/2} \doteq \mathbf{Z}^{\ell} + \text{MSSA}(\mathbf{Z}^{\ell} \mid \mathbf{U}_{[K]}^{\ell}), \quad \mathbf{Z}^{\ell+1} \doteq \text{ISTA}(\mathbf{Z}^{\ell+1/2} \mid \mathbf{D}^{\ell}). \quad (17)$$

Composing multiple such layers following the incremental construction of our representation in (2), we obtain a white-box transformer architecture that transforms the data tokens towards a compact and sparse union of incoherent subspaces.

This model has the parameters  $(\mathbf{U}_{[K]}^{\ell})_{\ell=1}^L$  and  $(\mathbf{D}^{\ell})_{\ell=1}^L$ , which are learned from data via *back-propagation*. Notably, in each layer  $\ell$ , the learned  $\mathbf{U}_{[K]}^{\ell}$  retain their interpretation as incoherent bases for supporting subspaces for the mixture-of-Gaussians model at layer  $\ell$ , and the learned  $\mathbf{D}^{\ell}$  retains its interpretation as a sparsifying dictionary at layer  $\ell$ . The parameters depend on the layer  $\ell$  so as to adapt to local properties of the data distribution at each layer of the network. Our interpretation clarifies the roles of the network forward pass (given local signal models at each layer, denoise/compress/sparsify the input) and the backward pass (learn the local signal models from data).

We note that at each stage of our construction, we have chosen the *simplest possible* construction to use. We can substitute each part of this construction, so long as the new part maintains the same conceptual role, and obtain another white-box architecture. Nevertheless, our such-constructed architecture, called CRATE (i.e., Coding RATE TransformEr), connects to existing transformer models, obtains competitive results on real-world datasets, and is fully mathematically interpretable.

### 3 Experiments

In this section, we conduct experiments to study the performance of our proposed white-box transformer CRATE on real-world datasets and tasks. As the analysis in Section 2 suggests, either the compression or the sparsification step can be achieved through various alternative design choices or strategies. CRATE arguably adopts the most basic choices and so our goal with the experiments is *not* simply to compete with other heavily engineered transformers while using such a rudimentary design. Rather, our goals are twofold. First, unlike any empirically designed black-box networks that are usually evaluated only on end-to-end performance, the white-box design of our network allows us to *look inside* the deep architecture and verify if layers of the learned network indeed perform their design objective—say performing incremental optimization for the objective (1). Second, despite their simplicity, our experiments will actually reveal the vast practical potential of our so-derived CRATE architectures since, as we will show, they already achieve very strong performance on large-scale real-world datasets and tasks. In the remainder of this section we highlight a selection of results; additional experimental details and results can be found in Appendix B.

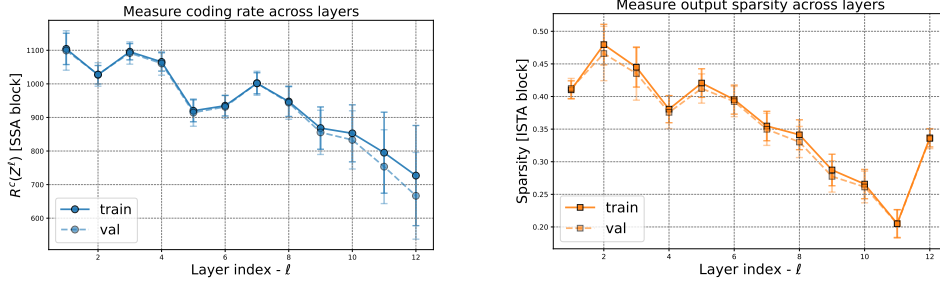

**Figure 3:** *Left:* The compression term  $R^c(\mathbf{Z}^{\ell+1/2})$  of the MSSA outputs at different layers. *Right:* the sparsity of the ISTA output block,  $\|\mathbf{Z}^{\ell+1}\|_0/(d \cdot N)$ , at different layers. (Model: CRATE-Small).

**Model architecture.** We implement the architecture that is described in Section 2.5, with minor modifications that are described in Appendix B.1. We consider different model sizes of CRATE by varying the token dimension  $d$ , number of heads  $K$ , and the number of layers  $L$ . We consider four model sizes in this work: CRATE-Tiny, CRATE-Small, CRATE-Base, and CRATE-Large. A PyTorch-style pseudocode can be found in Appendix B.1, which contains more implementation details. For training using supervised classification, we first take the CLS token  $\bar{\mathbf{z}}_b = \mathbf{z}_{1,b}^{L+1}$  of for each sample, then apply a linear layer; the output of this linear layer  $\mathbf{u}_b \doteq \mathbf{W}\bar{\mathbf{z}}_b$  is used as input to the standard cross-entropy loss. The overall loss averages over all samples  $b \in [B]$ .

**Datasets and optimization.** We mainly consider ImageNet-1K [9] as the testbed for our architecture. Specifically, we apply the Lion optimizer [71] to train CRATE models with different model sizes. Meanwhile, we also evaluate the transfer learning performance of CRATE: by considering the models trained on ImageNet-1K as pre-trained models, we fine-tune CRATE on several commonly used downstream datasets (CIFAR10/100, Oxford Flowers, Oxford-IIT-Pets). More details about the training and datasets can be found in Appendix B.1.

### 3.1 In-depth Layer-wise Analysis of CRATE

**Do layers of CRATE achieve their design goals?** As described in Section 2.3 and Section 2.4, the MSSA block is designed to optimize the compression term  $R^c(\mathbf{Z})$  and the ISTA block to sparsify the token representations (corresponding to the sparsification term  $\|\mathbf{Z}\|_0$ ). To understand whether CRATE indeed optimizes these terms, for each layer  $\ell$ , we measure (i) the compression term  $R^c(\mathbf{Z}^{\ell+1/2})$  on the MSSA block outputs  $\mathbf{Z}^{\ell+1/2}$ ; and (ii) sparsity  $\|\mathbf{Z}^{\ell+1}\|_0$  on the ISTA block outputs  $\mathbf{Z}^{\ell+1}$ . Specifically, we evaluate these two terms by using training/validation samples from ImageNet-1K. Both terms are evaluated at the per-sample level and averaged over  $B = 10^3$  samples.

Figure 3 shows the plots of these two key measures at all layers for the learned CRATE-small model. We find that as the layer index  $\ell$  increases, both the compression and the sparsification terms improve in most cases. The increase in the sparsity measure of the last layer is caused by the extra linear layer for classification. These results suggest that CRATE aligns well with the original design goals: once learned, it essentially learns to gradually compress and sparsity the representations through its layers. In addition, we also measure the compression and sparsification terms on CRATE models with different model sizes as well as intermediate model checkpoints and the results are shown by plots in Figure 5 of Appendix B.2. The observations are very consistent across all different model sizes—both the compression and sparsification terms improve in most scenarios. Models with more layers tend to optimize the objectives more effectively, confirming our understanding of each layer’s roles.

To see the effect of learning, we present the evaluations on CRATE-Small trained with different number of epochs in Figure 4. When the model is not trained enough (e.g. untrained), the architecture does not optimize the objectives effectively. However, during training—learning better subspaces  $\mathbf{U}_{[K]}^\ell$  and dictionaries  $\mathbf{D}^\ell$ —the designed blocks start to optimize the objectives much more effectively.

**Visualizing layer-wise token representations.** To gain a better understanding of the token representations of CRATE, we visualize the output of each ISTA block at layer  $\ell$  in Figure 6 of Appendix B.2. Specifically, we visualize the  $\mathbf{Z}^{\ell+1}$  via heatmap plots. We observe that the output  $\mathbf{Z}^{\ell+1}$  becomes more sparse as the layer increases. Moreover, besides the sparsity, we also find that  $\mathbf{Z}^{\ell+1}$  becomes more structured (i.e., low-rank), which indicates that the set of token representations become closer to linear subspaces, confirming our mental picture of the geometry of each layer (as in Figure 1).

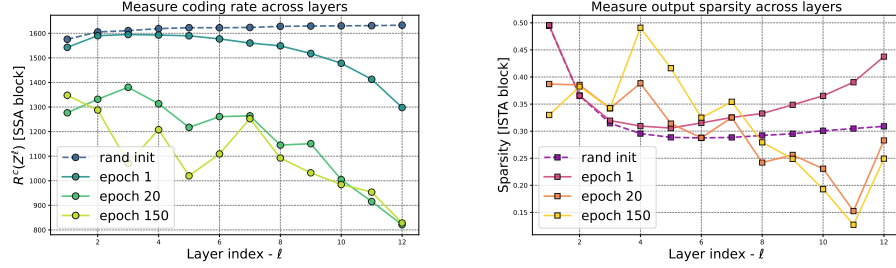

**Figure 4:** The compression term  $R^c(\mathbf{Z})$  (left) and sparsification term  $\|\mathbf{Z}\|_0/(d \cdot N)$  (right) across models trained with different numbers of epochs. (Model: CRATE-Base).

**Table 1:** Top 1 accuracy of CRATE on various datasets with different model scales when pre-trained on ImageNet. For ImageNet/ImageNetReaL, we directly evaluate the top-1 accuracy. For other datasets, we use models that are pre-trained on ImageNet as initialization and the evaluate the transfer learning performance via fine-tuning.

| Datasets           | CRATE-T | CRATE-S | CRATE-B | CRATE-L | ViT-T | ViT-S  |
|--------------------|---------|---------|---------|---------|-------|--------|
| # parameters       | 6.09M   | 13.12M  | 22.80M  | 77.64M  | 5.72M | 22.05M |
| ImageNet           | 66.7    | 69.2    | 70.8    | 71.3    | 71.5  | 72.4   |
| ImageNet ReaL      | 74.0    | 76.0    | 76.5    | 77.4    | 78.3  | 78.4   |
| CIFAR10            | 95.5    | 96.0    | 96.8    | 97.2    | 96.6  | 97.2   |
| CIFAR100           | 78.9    | 81.0    | 82.7    | 83.6    | 81.8  | 83.2   |
| Oxford Flowers-102 | 84.6    | 87.1    | 88.7    | 88.3    | 85.1  | 88.5   |
| Oxford-IIIT-Pets   | 81.4    | 84.9    | 85.3    | 87.4    | 88.5  | 88.6   |

**Visualizing layer-wise subspaces in multi-head self-attention.** We now visualize the  $U_{[K]}^\ell$  matrices used in the MSSA block. In Section 2.3, we assumed that  $U_{[K]}^\ell$  were incoherent to capture different “views” of the set of tokens. In Fig. 7 of Appendix B.2, we first normalize the columns in each  $U_k^\ell$ , then we visualize the  $[U_1^\ell, \dots, U_K^\ell]^* [U_1^\ell, \dots, U_K^\ell] \in \mathbb{R}^{pK \times pK}$ . The  $(i, j)$ -th block in each sub-figure corresponds to  $(U_i^\ell)^* U_j^\ell$  for  $i, j \in [K]$  at a particular layer  $\ell$ . We find that the learned  $U_{[K]}^\ell$  are approximately incoherent, which aligns well with our assumptions. One interesting observation is that the  $U_{[K]}^\ell$  becomes more incoherent when the layer index  $\ell$  is larger, which suggests that the token representations are more separable. This mirrors the situation in other popular deep networks [57].

### 3.2 Evaluations of CRATE on Large Real-World Datasets and Tasks

We now study the empirical performance of the proposed networks by measuring their top-1 accuracy on ImageNet-1K as well as transfer learning performance on several widely used downstream datasets. We summarize the results in Table 1. As our designed architecture leverages parameter sharing in both the attention block (MSSA) and the MLP block (ISTA), our CRATE-Base model (22.08 million) has a similar number of parameters to the ViT-Small (22.05 million).

From Table 1, we find that with a similar number of model parameters, our proposed network achieves similar ImageNet-1K and transfer learning performance as ViT, despite the simplicity and interpretability of our design. Moreover, with the same set of training hyperparameters, we observe promising scaling behavior in CRATE—we consistently improve the performance by scaling up the model size. For comparison, directly scaling ViT on ImageNet-1K does not always lead to consistent performance improvement measured by top-1 accuracy [40]. To summarize, we achieve promising performance on real-world large-scale datasets by directly implementing our principled architecture.

## 4 Conclusion

In this paper, we propose a new theoretical framework that allows us to derive deep transformer-like network architectures as incremental optimization schemes to learn compressed and sparse representation of the input data (or token sets). The so derived and learned deep architectures are not only fully mathematically interpretable, but also consistent on a layer-by-layer level with their design objective. Despite being arguably the simplest among all possible designs, these networks already demonstrate performance on large-scale real-world datasets and tasks close to seasoned transformers. We believe this work truly helps bridge the gap between theory and practice of deep neural networks as well as help unify seemingly separate approaches to learning and representing data distributions. Probably more importantly for practitioners, our framework provides theoretical guidelines to design and justify new, potentially more powerful, deep architectures for representation learning.

## References

- [1] Charles M Stein. “Estimation of the Mean of a Multivariate Normal Distribution”. *The Annals of Statistics* 9.6 (Nov. 1981), pp. 1135–1151. 4.
- [2] Bruno A Olshausen and David J Field. “Sparse coding with an overcomplete basis set: A strategy employed by V1?”. *Vision research* 37.23 (1997), pp. 3311–3325. 2.
- [3] David L Donoho and Carrie Grimes. “Image Manifolds which are Isometric to Euclidean Space”. *Journal of mathematical imaging and vision* 23.1 (July 2005), pp. 5–24. 1.
- [4] Aapo Hyvärinen. “Estimation of Non-Normalized Statistical Models by Score Matching”. *Journal of machine learning research: JMLR* 6.24 (2005), pp. 695–709. 4.
- [5] Michael B Wakin, David L Donoho, Hyeokho Choi, and Richard G Baraniuk. “The multiscale structure of non-differentiable image manifolds”. *Wavelets XI*. Vol. 5914. SPIE. 2005, pp. 413–429. 1.
- [6] Yi Ma, Harm Derksen, Wei Hong, and John Wright. “Segmentation of multivariate mixed data via lossy data coding and compression”. *PAMI* (2007). 2, 3, 5.
- [7] Maria-Elena Nilsback and Andrew Zisserman. “Automated flower classification over a large number of classes”. *2008 Sixth Indian Conference on Computer Vision, Graphics & Image Processing*. IEEE. 2008, pp. 722–729. 24.
- [8] Amir Beck and Marc Teboulle. “A fast iterative shrinkage-thresholding algorithm for linear inverse problems”. *SIAM journal on imaging sciences* 2.1 (2009), pp. 183–202. 6.
- [9] Jia Deng, Wei Dong, Richard Socher, Li-Jia Li, Kai Li, and Li Fei-Fei. “Imagenet: A large-scale hierarchical image database”. *2009 IEEE conference on computer vision and pattern recognition*. Ieee. 2009, pp. 248–255. 8.
- [10] Alex Krizhevsky, Geoffrey Hinton, et al. “Learning multiple layers of features from tiny images” (2009). 24.
- [11] Karol Gregor and Yann LeCun. “Learning fast approximations of sparse coding”. *Proceedings of the 27th International Conference on International Conference on Machine Learning*. Omnipress. 2010, pp. 399–406. 2.
- [12] László Györfi, Michael Kohler, Adam Krzyzak, and Harro Walk. *A Distribution-Free Theory of Nonparametric Regression*. Springer New York, Dec. 2010. 4.
- [13] Bradley Efron. “Tweedie’s Formula and Selection Bias”. *Journal of the American Statistical Association* 106.496 (2011), pp. 1602–1614. 2, 4, 14.
- [14] Martin Raphan and Eero P Simoncelli. “Least squares estimation without priors or supervision”. *Neural computation* 23.2 (Feb. 2011), pp. 374–420. 4.
- [15] Pascal Vincent. “A connection between score matching and denoising autoencoders”. *Neural computation* 23.7 (July 2011), pp. 1661–1674. 4.
- [16] Omkar M Parkhi, Andrea Vedaldi, Andrew Zisserman, and CV Jawahar. “Cats and dogs”. *2012 IEEE conference on computer vision and pattern recognition*. IEEE. 2012, pp. 3498–3505. 24.
- [17] Daniel A Spielman, Huan Wang, and John Wright. “Exact Recovery of Sparsely-Used Dictionaries” (June 2012). arXiv: 1206.5882 [cs.LG]. 2.
- [18] Joan Bruna and Stéphane Mallat. “Invariant scattering convolution networks”. *IEEE transactions on pattern analysis and machine intelligence* 35.8 (Aug. 2013), pp. 1872–1886. 2.
- [19] Peyman Milanfar. “A Tour of Modern Image Filtering: New Insights and Methods, Both Practical and Theoretical”. *IEEE Signal Processing Magazine* 30.1 (Jan. 2013), pp. 106–128. 4.
- [20] Singanallur V Venkatakrisnan, Charles A Bouman, and Brendt Wohlberg. “Plug-and-Play priors for model based reconstruction”. *2013 IEEE Global Conference on Signal and Information Processing*. Dec. 2013, pp. 945–948. 4.
- [21] Rémi Gribonval, Rodolphe Jenatton, and Francis Bach. “Sparse and spurious: dictionary learning with noise and outliers” (July 2014). arXiv: 1407.5155 [cs.LG]. 2.
- [22] Jascha Sohl-Dickstein, Eric A Weiss, Niru Maheswaranathan, and Surya Ganguli. “Deep Unsupervised Learning using Nonequilibrium Thermodynamics” (Mar. 2015). arXiv: 1503.03585 [cs.LG]. 1, 4.
- [23] Kaiming He, Xiangyu Zhang, Shaoqing Ren, and Jian Sun. “Deep Residual Learning for Image Recognition”. *2016 IEEE Conference on Computer Vision and Pattern Recognition (CVPR)*. June 2016, pp. 770–778. 1.

- [24] René Vidal, Yi Ma, and Shankar Sastry. *Generalized Principal Component Analysis*. Springer Verlag, 2016. 5.
- [25] Kaiming He, Georgia Gkioxari, Piotr Dollár, and Ross Girshick. “Mask R-CNN” (Mar. 2017). arXiv: [1703.06870 \[cs.CV\]](#). 1.
- [26] Ilya Loshchilov and Frank Hutter. “Decoupled weight decay regularization”. *arXiv preprint arXiv:1711.05101* (2017). 24.
- [27] Yaniv Romano, Michael Elad, and Peyman Milanfar. “The Little Engine That Could: Regularization by Denoising (RED)”. *SIAM journal on imaging sciences* 10.4 (Jan. 2017), pp. 1804–1844. 4.
- [28] Ashish Vaswani, Noam Shazeer, Niki Parmar, Jakob Uszkoreit, Llion Jones, Aidan N Gomez, Łukasz Kaiser, and Illia Polosukhin. “Attention is all you need”. *Advances in neural information processing systems* 30 (2017). 1, 3, 6.
- [29] Yubei Chen, Dylan Paiton, and Bruno Olshausen. “The sparse manifold transform”. *Advances in neural information processing systems* 31 (2018). 2.
- [30] Jacob Devlin, Ming-Wei Chang, Kenton Lee, and Kristina Toutanova. “Bert: Pre-training of deep bidirectional transformers for language understanding”. *arXiv preprint arXiv:1810.04805* (2018). 1.
- [31] Tero Karras, Samuli Laine, and Timo Aila. “A Style-Based Generator Architecture for Generative Adversarial Networks” (Dec. 2018). arXiv: [1812.04948 \[cs.NE\]](#). 1.
- [32] Vardan Papayan, Yaniv Romano, Jeremias Sulam, and Michael Elad. “Theoretical Foundations of Deep Learning via Sparse Representations: A Multilayer Sparse Model and Its Connection to Convolutional Neural Networks”. *IEEE Signal Processing Magazine* 35.4 (July 2018), pp. 72–89. 2.
- [33] Xiaoxia Sun, Nasser M Nasrabadi, and Trac D Tran. “Supervised deep sparse coding networks”. *2018 25th IEEE International Conference on Image Processing (ICIP)*. IEEE. 2018, pp. 346–350. 6.
- [34] Yang Song and Stefano Ermon. “Generative Modeling by Estimating Gradients of the Data Distribution” (July 2019). arXiv: [1907.05600 \[cs.LG\]](#). 1.
- [35] John Zarka, Louis Thiry, Tomás Angles, and Stéphane Mallat. “Deep network classification by scattering and homotopy dictionary learning”. *arXiv preprint arXiv:1910.03561* (2019). 6.
- [36] Lucas Beyer, Olivier J Hénaff, Alexander Kolesnikov, Xiaohua Zhai, and Aäron van den Oord. “Are we done with imagenet?” *arXiv preprint arXiv:2006.07159* (2020). 24.
- [37] Tom Brown, Benjamin Mann, Nick Ryder, Melanie Subbiah, Jared D Kaplan, Prafulla Dhariwal, Arvind Neelakantan, Pranav Shyam, Girish Sastry, Amanda Askell, et al. “Language models are few-shot learners”. *Advances in neural information processing systems* 33 (2020), pp. 1877–1901. 1.
- [38] Nicolas Carion, Francisco Massa, Gabriel Synnaeve, Nicolas Usunier, Alexander Kirillov, and Sergey Zagoruyko. “End-to-End Object Detection with Transformers” (May 2020). arXiv: [2005.12872 \[cs.CV\]](#). 1.
- [39] Ting Chen, Simon Kornblith, Mohammad Norouzi, and Geoffrey Hinton. “A Simple Framework for Contrastive Learning of Visual Representations”. *Proceedings of the 37th International Conference on Machine Learning*. Ed. by Hal Daumé Iii and Aarti Singh. Vol. 119. Proceedings of Machine Learning Research. PMLR, 2020, pp. 1597–1607. 1.
- [40] Alexey Dosovitskiy, Lucas Beyer, Alexander Kolesnikov, Dirk Weissenborn, Xiaohua Zhai, Thomas Unterthiner, Mostafa Dehghani, Matthias Minderer, Georg Heigold, Sylvain Gelly, et al. “An image is worth 16x16 words: Transformers for image recognition at scale”. *arXiv preprint arXiv:2010.11929* (2020). 1, 3, 9.
- [41] Jonathan Ho, Ajay Jain, and Pieter Abbeel. “Denoising diffusion probabilistic models”. *Advances in Neural Information Processing Systems* 33 (2020), pp. 6840–6851. 1.
- [42] Zahra Kadhodaie and Eero P Simoncelli. “Solving Linear Inverse Problems Using the Prior Implicit in a Denoiser” (July 2020). arXiv: [2007.13640 \[cs.CV\]](#). 4.
- [43] Jiaming Song, Chenlin Meng, and Stefano Ermon. “Denoising Diffusion Implicit Models” (Oct. 2020). arXiv: [2010.02502 \[cs.LG\]](#). 1, 4.
- [44] Yang Song, Jascha Sohl-Dickstein, Diederik P Kingma, Abhishek Kumar, Stefano Ermon, and Ben Poole. “Score-Based Generative Modeling through Stochastic Differential Equations” (Nov. 2020). arXiv: [2011.13456 \[cs.LG\]](#). 1, 4, 5.

- [45] Yonglong Tian, Chen Sun, Ben Poole, Dilip Krishnan, Cordelia Schmid, and Phillip Isola. “What makes for good views for contrastive learning?” *Advances in neural information processing systems* 33 (2020), pp. 6827–6839. 2.
- [46] Yaodong Yu, Kwan Ho Ryan Chan, Chong You, Chaobing Song, and Yi Ma. “Learning Diverse and Discriminative Representations via the Principle of Maximal Coding Rate Reduction”. *Advances in Neural Information Processing Systems* 33 (2020), pp. 9422–9434. 2, 3, 5, 17, 22.
- [47] Yuexiang Zhai, Zitong Yang, Zhenyu Liao, John Wright, and Yi Ma. “Complete dictionary learning via  $\ell_4$ -norm maximization over the orthogonal group”. *The Journal of Machine Learning Research* 21.1 (2020), pp. 6622–6689. 2.
- [48] Anurag Arnab, Mostafa Dehghani, Georg Heigold, Chen Sun, Mario Lučić, and Cordelia Schmid. “Vivit: A video vision transformer”. *Proceedings of the IEEE/CVF international conference on computer vision*. 2021, pp. 6836–6846. 1.
- [49] Kaiming He, Xinlei Chen, Saining Xie, Yanghao Li, Piotr Dollár, and Ross Girshick. “Masked Autoencoders Are Scalable Vision Learners” (Nov. 2021). arXiv: 2111.06377 [cs.CV]. 1.
- [50] Geoffrey Hinton. *How to represent part-whole hierarchies in a neural network*. 2021. arXiv: 2102.12627 [cs.CV]. 6.
- [51] Alec Radford, Jong Wook Kim, Chris Hallacy, Aditya Ramesh, Gabriel Goh, Sandhini Agarwal, Girish Sastry, Amanda Askell, Pamela Mishkin, Jack Clark, Gretchen Krueger, and Ilya Sutskever. “Learning Transferable Visual Models From Natural Language Supervision”. *Proceedings of the 38th International Conference on Machine Learning*. Ed. by Marina Meila and Tong Zhang. Vol. 139. Proceedings of Machine Learning Research. PMLR, 2021, pp. 8748–8763. 1.
- [52] Bahareh Tolooshams and Demba Ba. “Stable and Interpretable Unrolled Dictionary Learning”. *arXiv preprint arXiv:2106.00058* (2021). 2.
- [53] Ilya Tolstikhin, Neil Houlsby, Alexander Kolesnikov, Lucas Beyer, Xiaohua Zhai, Thomas Unterthiner, Jessica Yung, Andreas Steiner, Daniel Keysers, Jakob Uszkoreit, Mario Lucic, and Alexey Dosovitskiy. “MLP-Mixer: An all-MLP Architecture for Vision” (May 2021). arXiv: 2105.01601 [cs.CV]. 21.
- [54] Kwan Ho Ryan Chan, Yaodong Yu, Chong You, Haozhi Qi, John Wright, and Yi Ma. “ReduNet: A White-box Deep Network from the Principle of Maximizing Rate Reduction”. *Journal of Machine Learning Research* 23.114 (2022), pp. 1–103. 2, 3, 5, 6, 17, 18.
- [55] Hongrui Chen, Holden Lee, and Jianfeng Lu. “Improved Analysis of Score-based Generative Modeling: User-Friendly Bounds under Minimal Smoothness Assumptions”. *arXiv preprint arXiv:2211.01916* (2022). 2.
- [56] Yuan Gong, Andrew Rouditchenko, Alexander H Liu, David Harwath, Leonid Karlinsky, Hilde Kuehne, and James R Glass. “Contrastive audio-visual masked autoencoder”. *The Eleventh International Conference on Learning Representations*. 2022. 1.
- [57] Hangfeng He and Weijie J Su. “A law of data separation in deep learning”. *arXiv preprint arXiv:2210.17020* (2022). 9.
- [58] Geoffrey Hinton. *The Forward-Forward Algorithm: Some Preliminary Investigations*. 2022. arXiv: 2212.13345 [cs.LG]. 2.
- [59] Tero Karras, Miika Aittala, Timo Aila, and Samuli Laine. “Elucidating the design space of diffusion-based generative models”. *arXiv preprint arXiv:2206.00364* (2022). 2, 14.
- [60] Frederic Koehler, Alexander Heckett, and Andrej Risteski. “Statistical Efficiency of Score Matching: The View from Isoperimetry” (Oct. 2022). arXiv: 2210.00726 [cs.LG]. 2.
- [61] Yi Ma, Doris Tsao, and Heung-Yeung Shum. “On the principles of parsimony and self-consistency for the emergence of intelligence”. *Frontiers of Information Technology & Electronic Engineering* 23.9 (2022), pp. 1298–1323. 1, 3.
- [62] Druv Pai, Michael Psenka, Chih-Yuan Chiu, Manxi Wu, Edgar Dobriban, and Yi Ma. “Pursuit of a discriminative representation for multiple subspaces via sequential games”. *arXiv preprint arXiv:2206.09120* (2022). 2.
- [63] Mary Phuong and Marcus Hutter. “Formal algorithms for transformers”. *arXiv preprint arXiv:2207.09238* (2022). 19.
- [64] Robin Rombach, Andreas Blattmann, Dominik Lorenz, Patrick Esser, and Björn Ommer. “High-resolution image synthesis with latent diffusion models”. *Proceedings of the IEEE/CVF Conference on Computer Vision and Pattern Recognition*. 2022, pp. 10684–10695. 1, 2.

- [65] Chitwan Saharia, William Chan, Saurabh Saxena, Lala Li, Jay Whang, Emily Denton, Seyed Kamyar Seyed Ghasemipour, Burcu Karagol Ayan, S Sara Mahdavi, Rapha Gontijo Lopes, Tim Salimans, Jonathan Ho, David J Fleet, and Mohammad Norouzi. “Photorealistic Text-to-Image Diffusion Models with Deep Language Understanding” (May 2022). arXiv: [2205.11487 \[cs.CV\]](#). 1.
- [66] Asher Trockman, Devin Willmott, and J Zico Kolter. “Understanding the Covariance Structure of Convolutional Filters” (Oct. 2022). arXiv: [2210.03651 \[cs.CV\]](#). 21.
- [67] Rene Vidal. *Attention: Self-Expression Is All You Need*. Unpublished; available: <https://openreview.net/forum?id=MmujBClawFo>. 2022. 1.
- [68] Haoqing Wang, Xun Guo, Zhi-Hong Deng, and Yan Lu. “Rethinking minimal sufficient representation in contrastive learning”. *Proceedings of the IEEE/CVF Conference on Computer Vision and Pattern Recognition*. 2022, pp. 16041–16050. 2.
- [69] John Wright and Yi Ma. *High-Dimensional Data Analysis with Low-Dimensional Models: Principles, Computation, and Applications*. Cambridge University Press, 2022. 3, 19–21.
- [70] Sitan Chen, Giannis Daras, and Alexandros G Dimakis. “Restoration-Degradation Beyond Linear Diffusions: A Non-Asymptotic Analysis For DDIM-Type Samplers” (Mar. 2023). arXiv: [2303.03384 \[cs.LG\]](#). 5.
- [71] Xiangning Chen, Chen Liang, Da Huang, Esteban Real, Kaiyuan Wang, Yao Liu, Hieu Pham, Xuanyi Dong, Thang Luong, Cho-Jui Hsieh, et al. “Symbolic discovery of optimization algorithms”. *arXiv preprint arXiv:2302.06675* (2023). 8, 24.
- [72] Mostafa Dehghani, Josip Djolonga, Basil Mustafa, Piotr Padlewski, Jonathan Heek, Justin Gilmer, Andreas Steiner, Mathilde Caron, Robert Geirhos, Ibrahim Alabdulmohsin, et al. “Scaling vision transformers to 22 billion parameters”. *arXiv preprint arXiv:2302.05442* (2023). 1.
- [73] Alexander Kirillov, Eric Mintun, Nikhila Ravi, Hanzi Mao, Chloe Rolland, Laura Gustafson, Tete Xiao, Spencer Whitehead, Alexander C Berg, Wan-Yen Lo, Piotr Dollár, and Ross Girshick. “Segment Anything” (Apr. 2023). arXiv: [2304.02643 \[cs.CV\]](#). 1.
- [74] Hongkang Li, Meng Wang, Sijia Liu, and Pin-Yu Chen. “A Theoretical Understanding of shallow Vision Transformers: Learning, Generalization, and Sample Complexity”. *arXiv preprint arXiv:2302.06015* (2023). 1.
- [75] Zonglin Li, Chong You, Srinadh Bhojanapalli, Daliang Li, Ankit Singh Rawat, Sashank J Reddi, Ke Ye, Felix Chern, Felix Yu, Ruiqi Guo, and Sanjiv Kumar. “The Lazy Neuron Phenomenon: On Emergence of Activation Sparsity in Transformers”. *The Eleventh International Conference on Learning Representations*. 2023. 21.
- [76] Ravid Shwartz-Ziv and Yann LeCun. “To Compress or Not to Compress–Self-Supervised Learning and Information Theory: A Review”. *arXiv preprint arXiv:2304.09355* (2023). 2.
- [77] Yang Song, Prafulla Dhariwal, Mark Chen, and Ilya Sutskever. “Consistency models”. *arXiv preprint arXiv:2303.01469* (2023). 2.

## A Technical Details from Section 2

### A.1 Companion to Section 2.2

We first wish to re-iterate the core contributions of our approach in Section 2.2 at a slightly more technical level. Connections between denoising and score matching are well-understood [59], and computing the optimal denoising function (i.e., the conditional expectation) against a mixture-of-Gaussians model is a rather simple computation giving existing tools such as Tweedie’s formula [13]. These are not our main contributions. Instead, the main contributions of Section 2.2 are two-fold:

- First, we demonstrate a mechanism to learn representations via denoising within a idealized mixture of Gaussian data model for a single token (i.e., with sequence length  $N = 1$ ).
- Second, we illustrate the similarities between a such-derived representation learning scheme and existing self-attention layers within the transformer (with sequence length 1), thus demonstrating an interpretation of the self-attention layer as a generalized mechanism to denoise against a mixture-of-Gaussian-marginal model for a set of tokens.

Now we produce the proofs alluded to in Section 2.2, which mostly form the technical aspects of the first listed contribution. To simplify the proofs, we use the following notation correspondences:  $\mathbf{x} \mapsto \mathbf{z}^\ell$ ,  $\mathbf{z} \mapsto \mathbf{z}^{\ell+1}$ , and  $\sigma \mapsto \sigma^\ell$ .

**Proposition 1.** *Let  $\mathbf{u}_1, \dots, \mathbf{u}_K \in \mathbb{R}^d$  be independent and have distribution  $\mathbf{u}_k \sim \mathcal{N}(\mathbf{0}, \Sigma_k)$  for  $\Sigma_k \succeq \mathbf{0}$ , and let  $\mathbf{z}$  take value  $\mathbf{u}_k$  with probability  $\pi_k > 0$ . Let  $\mathbf{w} \sim \mathcal{N}(\mathbf{0}, \mathbf{I}_d)$  be independent of  $\mathbf{z}$ . Let  $\mathbf{x} \doteq \mathbf{z} + \sigma \mathbf{w}$ . Let  $\mathbf{x} \mapsto q(\mathbf{x})$  be the density of  $\mathbf{x}$ . We define*

$$\mathbf{M}_k \doteq (\Sigma_k + \sigma^2 \mathbf{I}_d)^{-1/2} \quad (18)$$

and assume that  $\pi_i \det(\mathbf{M}_i) = \pi_j \det(\mathbf{M}_j)$  for all  $1 \leq i \leq j \leq K$ . Then we have

$$\nabla_{\mathbf{x}} \log q(\mathbf{x}) \quad (19)$$

$$= -[\mathbf{M}_1, \dots, \mathbf{M}_K] \left[ \text{diag} \left( \text{softmax} \left( -\frac{1}{2} \begin{bmatrix} \|\mathbf{M}_1^* \mathbf{x}\|_2^2 \\ \vdots \\ \|\mathbf{M}_K^* \mathbf{x}\|_2^2 \end{bmatrix} \right) \right) \otimes \mathbf{I}_d \right] \begin{bmatrix} \mathbf{M}_1^* \mathbf{x} \\ \vdots \\ \mathbf{M}_K^* \mathbf{x} \end{bmatrix}, \quad (20)$$

where  $\otimes$  denotes the Kronecker product, i.e., the block matrix defined by

$$\mathbf{A} \otimes \mathbf{B} = \begin{bmatrix} A_{11} \mathbf{B} & \cdots & A_{1n} \mathbf{B} \\ \vdots & \ddots & \vdots \\ A_{m1} \mathbf{B} & \cdots & A_{mn} \mathbf{B} \end{bmatrix} \quad (21)$$

*Proof.* Let  $u$  be the multinomial random variable such that  $\mathbf{z} = \mathbf{z}_u$ , so that  $u$  has probability mass function  $\pi$ . Then by the law of total probability, we have

$$\nabla_{\mathbf{x}} \log q(\mathbf{x}) = \nabla_{\mathbf{x}} \log \sum_{k=1}^K q(\mathbf{x} | k) \pi_k \quad (22)$$

$$= \frac{\sum_{k=1}^K \pi_k \nabla_{\mathbf{x}} q(\mathbf{x} | k)}{\sum_{k=1}^K q(\mathbf{x} | k) \pi_k} \quad (23)$$

where  $q(\mathbf{x} | k)$  is the conditional density of  $\mathbf{x}$  given the event  $\{u = k\}$ . To compute this quantity, note that conditional on the value of  $u$ , we have

$$\mathbf{x} = \mathbf{z}_u + \sigma \mathbf{w} \sim \mathcal{N}(\mathbf{0}, \Sigma_u + \sigma^2 \mathbf{I}_d). \quad (24)$$

Thus we have

$$q(\mathbf{x} | k) = \frac{1}{\sqrt{(2\pi)^d \det(\Sigma_k + \sigma^2 \mathbf{I}_d)}} \exp \left( -\frac{1}{2} \mathbf{x}^* (\Sigma_k + \sigma^2 \mathbf{I}_d)^{-1} \mathbf{x} \right), \quad (25)$$

This gives

$$\nabla_{\mathbf{x}} q(\mathbf{x} | k) = -q(\mathbf{x} | k) \cdot (\Sigma_k + \sigma^2 \mathbf{I}_d)^{-1} \mathbf{x}. \quad (26)$$

Putting this all together, we get

$$\nabla_{\mathbf{x}} \log q(\mathbf{x}) \quad (27)$$

$$= - \frac{\sum_{k=1}^K q(\mathbf{x} | k) \pi_k \cdot (\boldsymbol{\Sigma}_k + \sigma^2 \mathbf{I}_d)^{-1} \mathbf{x}}{\sum_{k=1}^K q(\mathbf{x} | k) \pi_k} \quad (28)$$

$$= - \frac{\sum_{k=1}^K \pi_k \det(\boldsymbol{\Sigma}_k + \sigma^2 \mathbf{I}_d)^{-1/2} \exp(-\frac{1}{2} \mathbf{x}^* (\boldsymbol{\Sigma}_k + \sigma^2 \mathbf{I}_d)^{-1} \mathbf{x}) \cdot (\boldsymbol{\Sigma}_k + \sigma^2 \mathbf{I}_d)^{-1} \mathbf{x}}{\sum_{k=1}^K \pi_k \det(\boldsymbol{\Sigma}_k + \sigma^2 \mathbf{I}_d)^{-1/2} \exp(-\frac{1}{2} \mathbf{x}^* (\boldsymbol{\Sigma}_k + \sigma^2 \mathbf{I}_d)^{-1} \mathbf{x})}. \quad (29)$$

601 Now define  $\mathbf{M}_k \doteq (\boldsymbol{\Sigma}_k + \sigma^2 \mathbf{I}_d)^{-1/2}$ . With this notation, we have

$$\nabla_{\mathbf{x}} \log q(\mathbf{x}) = - \frac{\sum_{k=1}^K \pi_k \det(\mathbf{M}_k) \exp(-\frac{1}{2} \mathbf{x}^* \mathbf{M}_k \mathbf{M}_k^* \mathbf{x}) \cdot \mathbf{M}_k \mathbf{M}_k^* \mathbf{x}}{\sum_{k=1}^K \pi_k \det(\mathbf{M}_k) \exp(-\frac{1}{2} \mathbf{x}^* \mathbf{M}_k \mathbf{M}_k^* \mathbf{x})} \quad (30)$$

$$= - \frac{\sum_{k=1}^K \pi_k \det(\mathbf{M}_k) \exp(-\frac{1}{2} \|\mathbf{M}_k^* \mathbf{x}\|_2^2) \cdot \mathbf{M}_k \mathbf{M}_k^* \mathbf{x}}{\sum_{k=1}^K \pi_k \det(\mathbf{M}_k) \exp(-\frac{1}{2} \mathbf{x}^* \mathbf{M}_k \mathbf{M}_k^* \mathbf{x})}. \quad (31)$$

602 Given our assumption that each  $\pi_k \det(\mathbf{M}_k)$  is the same, we have

$$\nabla_{\mathbf{x}} \log q(\mathbf{x}) \quad (32)$$

$$= - \frac{\sum_{k=1}^K \pi_k \det(\mathbf{M}_k) \exp(-\frac{1}{2} \|\mathbf{M}_k^* \mathbf{x}\|_2^2) \cdot \mathbf{M}_k \mathbf{M}_k^* \mathbf{x}}{\sum_{k=1}^K \pi_k \det(\mathbf{M}_k) \exp(-\frac{1}{2} \|\mathbf{M}_k^* \mathbf{x}\|_2^2)} \quad (33)$$

$$= - \frac{\sum_{k=1}^K \exp(-\frac{1}{2} \|\mathbf{M}_k^* \mathbf{x}\|_2^2) \cdot \mathbf{M}_k \mathbf{M}_k^* \mathbf{x}}{\sum_{k=1}^K \exp(-\frac{1}{2} \|\mathbf{M}_k^* \mathbf{x}\|_2^2)} \quad (34)$$

$$= - \sum_{k=1}^K \mathbf{e}_k^* \text{softmax} \left( -\frac{1}{2} \begin{bmatrix} \|\mathbf{M}_1^* \mathbf{x}\|_2^2 \\ \vdots \\ \|\mathbf{M}_K^* \mathbf{x}\|_2^2 \end{bmatrix} \right) \mathbf{M}_k \mathbf{M}_k^* \mathbf{x} \quad (35)$$

$$= - [\mathbf{M}_1, \dots, \mathbf{M}_K] \left[ \text{diag} \left( \text{softmax} \left( -\frac{1}{2} \begin{bmatrix} \|\mathbf{M}_1^* \mathbf{x}\|_2^2 \\ \vdots \\ \|\mathbf{M}_K^* \mathbf{x}\|_2^2 \end{bmatrix} \right) \right) \otimes \mathbf{I}_d \right] \begin{bmatrix} \mathbf{M}_1^* \mathbf{x} \\ \vdots \\ \mathbf{M}_K^* \mathbf{x} \end{bmatrix}. \quad (36)$$

603

□

604 Now we provide a final justification for the result cited in Section 2.2.

605 **Approximation 2.** In the setting of Proposition 1, diagonalize  $\boldsymbol{\Sigma}_k = \mathbf{U}_k \boldsymbol{\Lambda}_k \mathbf{U}_k^*$  where  $\mathbf{U}_k \in \mathbb{R}^{d \times p}$   
 606 is orthogonal and  $\boldsymbol{\Lambda}_k \succ \mathbf{0} \in \mathbb{R}^{p \times p}$  is diagonal.<sup>9</sup> Then we have the approximation

$$\mathbb{E}[\mathbf{z} | \mathbf{x}] \approx [\mathbf{U}_1, \dots, \mathbf{U}_K] \left[ \text{diag} \left( \text{softmax} \left( \frac{1}{2\sigma^2} \begin{bmatrix} \|\mathbf{U}_1^* \mathbf{x}\|_2^2 \\ \vdots \\ \|\mathbf{U}_K^* \mathbf{x}\|_2^2 \end{bmatrix} \right) \right) \otimes \mathbf{I}_p \right] \begin{bmatrix} \mathbf{U}_1^* \mathbf{x} \\ \vdots \\ \mathbf{U}_K^* \mathbf{x} \end{bmatrix}. \quad (37)$$

607 *Proof.* We have

$$\nabla_{\mathbf{x}} \log q(\mathbf{x}) = - \sum_{k=1}^K \mathbf{e}_k^* \text{softmax} \left( -\frac{1}{2} \begin{bmatrix} \|\mathbf{M}_1^* \mathbf{x}\|_2^2 \\ \vdots \\ \|\mathbf{M}_K^* \mathbf{x}\|_2^2 \end{bmatrix} \right) \mathbf{M}_k \mathbf{M}_k^* \mathbf{x} \quad (38)$$

$$= - \sum_{k=1}^K \mathbf{e}_k^* \text{softmax} \left( -\frac{1}{2\sigma^2} \begin{bmatrix} \|\sigma \mathbf{M}_1^* \mathbf{x}\|_2^2 \\ \vdots \\ \|\sigma \mathbf{M}_K^* \mathbf{x}\|_2^2 \end{bmatrix} \right) \mathbf{M}_k \mathbf{M}_k^* \mathbf{x} \quad (39)$$

$$= - \sum_{k=1}^K \mathbf{e}_k^* \text{softmax} \left( \frac{1}{2\sigma^2} \begin{bmatrix} \|\mathbf{x}\|_2^2 - \|\sigma \mathbf{M}_1^* \mathbf{x}\|_2^2 \\ \vdots \\ \|\mathbf{x}\|_2^2 - \|\sigma \mathbf{M}_K^* \mathbf{x}\|_2^2 \end{bmatrix} \right) \mathbf{M}_k \mathbf{M}_k^* \mathbf{x}. \quad (40)$$

<sup>9</sup>This assumption can be easily relaxed to  $\boldsymbol{\Lambda}_k \succeq \mathbf{0}$  for all  $k$ , but requires some more notation to handle, and the form of the solution does not change. Thus we handle the case where all matrices are full rank for simplicity.

608 Now define  $P_k \doteq I_d - \sigma M_k$ , and let  $U_k^\perp \in \mathbb{R}^{d \times (d-p)}$  be an orthogonal complement of  $U_k$ . Then  
609 we have

$$P_k = I_d - \sigma M_k \quad (41)$$

$$= I_d - \sigma (\Sigma_k + \sigma^2 I_d)^{-1/2} \quad (42)$$

$$= I_d - \sigma \left( [U_k \ U_k^\perp] \begin{bmatrix} \Lambda_k & \mathbf{0} \\ \mathbf{0} & \mathbf{0} \end{bmatrix} \begin{bmatrix} U_k^* \\ (U_k^\perp)^* \end{bmatrix} + \sigma^2 I_d \right)^{-1/2} \quad (43)$$

$$= I_d - \sigma \left( [U_k \ U_k^\perp] \begin{bmatrix} \Lambda_k + \sigma^2 I_p & \mathbf{0} \\ \mathbf{0} & \sigma^2 I_{d-p} \end{bmatrix} \begin{bmatrix} U_k^* \\ (U_k^\perp)^* \end{bmatrix} \right)^{-1/2} \quad (44)$$

$$= I_d - [U_k \ U_k^\perp] \begin{bmatrix} \sigma(\Lambda_k + \sigma^2 I_p)^{-1/2} & \mathbf{0} \\ \mathbf{0} & \sigma \cdot (\sigma^2)^{-1/2} I_{d-p} \end{bmatrix} \begin{bmatrix} U_k^* \\ (U_k^\perp)^* \end{bmatrix} \quad (45)$$

$$= I_d - [U_k \ U_k^\perp] \begin{bmatrix} (\sigma^{-2} \Lambda_k + I_p)^{-1/2} & \mathbf{0} \\ \mathbf{0} & I_{d-p} \end{bmatrix} \begin{bmatrix} U_k^* \\ (U_k^\perp)^* \end{bmatrix} \quad (46)$$

$$= [U_k \ U_k^\perp] \begin{bmatrix} I_p - (\sigma^{-2} \Lambda_k + I_p)^{-1/2} & \mathbf{0} \\ \mathbf{0} & \mathbf{0} \end{bmatrix} \begin{bmatrix} U_k^* \\ (U_k^\perp)^* \end{bmatrix} \quad (47)$$

$$\approx [U_k \ U_k^\perp] \begin{bmatrix} I_p & \mathbf{0} \\ \mathbf{0} & \mathbf{0} \end{bmatrix} \begin{bmatrix} U_k^* \\ (U_k^\perp)^* \end{bmatrix} \quad (48)$$

$$= U_k U_k^*. \quad (49)$$

610 Thus  $P_k$  is approximately a projection when  $\sigma$  is small. Under this algebraic relation, we have

$$\nabla_{\mathbf{x}} \log q(\mathbf{x}) \quad (50)$$

$$= - \sum_{k=1}^K e_k^* \text{softmax} \left( \frac{1}{2\sigma^2} \begin{bmatrix} \|\mathbf{x}\|_2^2 - \|\sigma M_1^* \mathbf{x}\|_2^2 \\ \vdots \\ \|\mathbf{x}\|_2^2 - \|\sigma M_K^* \mathbf{x}\|_2^2 \end{bmatrix} \right) M_k M_k^* \mathbf{x} \quad (51)$$

$$= - \frac{1}{\sigma^2} \sum_{k=1}^K e_k^* \text{softmax} \left( \frac{1}{2\sigma^2} \begin{bmatrix} \|\mathbf{x}\|_2^2 - \|(I_d - P_1)^* \mathbf{x}\|_2^2 \\ \vdots \\ \|\mathbf{x}\|_2^2 - \|(I_d - P_K)^* \mathbf{x}\|_2^2 \end{bmatrix} \right) (I_d - P_k)(I_d - P_k)^* \mathbf{x} \quad (52)$$

$$\approx - \frac{1}{\sigma^2} \sum_{k=1}^K e_k^* \text{softmax} \left( \frac{1}{2\sigma^2} \begin{bmatrix} \|P_1^* \mathbf{x}\|_2^2 \\ \vdots \\ \|P_K^* \mathbf{x}\|_2^2 \end{bmatrix} \right) (I_d - P_k)(I_d - P_k)^* \mathbf{x} \quad (53)$$

$$\approx - \frac{1}{\sigma^2} \sum_{k=1}^K e_k^* \text{softmax} \left( \frac{1}{2\sigma^2} \begin{bmatrix} \|P_1^* \mathbf{x}\|_2^2 \\ \vdots \\ \|P_K^* \mathbf{x}\|_2^2 \end{bmatrix} \right) (I_d - P_k)^* \mathbf{x} \quad (54)$$

$$= - \frac{\mathbf{x}}{\sigma^2} \sum_{k=1}^K e_k^* \text{softmax} \left( \frac{1}{2\sigma^2} \begin{bmatrix} \|P_1^* \mathbf{x}\|_2^2 \\ \vdots \\ \|P_K^* \mathbf{x}\|_2^2 \end{bmatrix} \right) + \frac{1}{\sigma^2} \sum_{k=1}^K e_k^* \text{softmax} \left( \frac{1}{2\sigma^2} \begin{bmatrix} \|P_1^* \mathbf{x}\|_2^2 \\ \vdots \\ \|P_K^* \mathbf{x}\|_2^2 \end{bmatrix} \right) P_k^* \mathbf{x} \quad (55)$$

$$= - \frac{1}{\sigma^2} \mathbf{x} + \frac{1}{\sigma^2} \sum_{k=1}^K e_k^* \text{softmax} \left( \frac{1}{2\sigma^2} \begin{bmatrix} \|P_1^* \mathbf{x}\|_2^2 \\ \vdots \\ \|P_K^* \mathbf{x}\|_2^2 \end{bmatrix} \right) P_k^* \mathbf{x} \quad (56)$$

$$\approx - \frac{1}{\sigma^2} \mathbf{x} + \frac{1}{\sigma^2} \sum_{k=1}^K e_k^* \text{softmax} \left( \frac{1}{2\sigma^2} \begin{bmatrix} \|U_1^* \mathbf{x}\|_2^2 \\ \vdots \\ \|U_K^* \mathbf{x}\|_2^2 \end{bmatrix} \right) U_k U_k^* \mathbf{x} \quad (57)$$

$$= - \frac{1}{\sigma^2} \mathbf{x} + \frac{1}{\sigma^2} [U_1, \dots, U_K] \left[ \text{diag} \left( \text{softmax} \left( \frac{1}{2\sigma^2} \begin{bmatrix} \|U_1^* \mathbf{x}\|_2^2 \\ \vdots \\ \|U_K^* \mathbf{x}\|_2^2 \end{bmatrix} \right) \right) \otimes I_p \right] \begin{bmatrix} U_1^* \mathbf{x} \\ \vdots \\ U_K^* \mathbf{x} \end{bmatrix}. \quad (58)$$

611 Plugging this into Tweedie’s formula, we have

$$\mathbb{E}[\mathbf{z} \mid \mathbf{x}] \approx [\mathbf{U}_1, \dots, \mathbf{U}_K] \left[ \text{diag} \left( \text{softmax} \left( \frac{1}{2\sigma^2} \begin{bmatrix} \|\mathbf{U}_1^* \mathbf{x}\|_2^2 \\ \vdots \\ \|\mathbf{U}_K^* \mathbf{x}\|_2^2 \end{bmatrix} \right) \right) \otimes \mathbf{I}_p \right] \begin{bmatrix} \mathbf{U}_1^* \mathbf{x} \\ \vdots \\ \mathbf{U}_K^* \mathbf{x} \end{bmatrix}. \quad (59)$$

612

□

613 *Remark 3.* Although Approximation 2 is stated as an approximation rather than as a proposition, we  
 614 believe it should be possible without too much extra work to convert it into a statement of asymptotic  
 615 equivalence as  $\sigma \rightarrow 0$  (in particular, holding for  $\sigma$  below the smallest (nonzero) eigenvalue of any  
 616  $\Sigma_k$ . Most approximations taken in the derivation of Approximation 2 can immediately be turned into  
 617 asymptotic claims; the only slightly delicate point is treating the softmax, which can be accomplished  
 618 using standard “high temperature” convergence behavior of the softmax function (in particular, as  
 619  $\sigma \rightarrow 0$  in our expressions, the softmax concentrates on the “best head”).

## 620 A.2 Companion to Section 2.3

621 We again wish to re-iterate the core contribution of our approach in Section 2.3. The application of a  
 622 compression perspective to representation learning has been discussed before, for example in the line  
 623 of maximal coding rate reduction works [46]. In Section 2.3, we provide the following contributions  
 624 and developments to this perspective:

- 625 • We propose a generalized coding rate function  $R^c(\cdot; \mathbf{U}_{[K]})$  which measures the coding rate  
 626 with respect to a set of subspaces  $\mathbf{U}_{[K]}$  as opposed to a set of classes (as in [46, 54]), making  
 627 the underlying formulation unsupervised.
- 628 • We then show how if we adopt the framework of alternating minimization of the sparse rate  
 629 reduction objective, then unrolling the first alternating step — gradient descent on this coding  
 630 rate objective — nearly exactly recovers the common multi-head attention mechanism found  
 631 in transformer networks (except that the query/key/value operators are all the same operation  
 632  $\mathbf{U}_k^*$  now, which we interpret as projection onto a single subspace).

633 In the process of the second contribution, and in the following proofs, we make some simple  
 634 approximations and technical assumptions. The validity of these assumptions may be explored, and  
 635 the approximations refined, altogether providing a more complex (and possibly more performant)  
 636 resulting self-attention like operator. For the sake of technical clarity and simplicity in this work, we  
 637 make perhaps the *simplest possible choices*. As a result, we *do not* claim that our network is optimally  
 638 designed, but rather that the principles we develop in this work (compression, denoising, sparsification,  
 639 unrolled optimization) can provide the backbone for far superior and more interpretable network  
 640 architectures in the future on sundry tasks. As it is, with our straightforward, simple, and interpretable  
 641 design, we still obtain meaningful conceptual results and very solid empirical performance.

642 We now give the derivation of the approximation alluded to in Section 2.3.

643 **Approximation 4.** Let  $\mathbf{Z} \in \mathbb{R}^{d \times N}$  have unit-norm columns, and  $\mathbf{U}_{[K]} = (\mathbf{U}_1, \dots, \mathbf{U}_K)$  such that  
 644 each  $\mathbf{U}_k \in \mathbb{R}^{d \times p}$  is an orthogonal matrix, the  $(\mathbf{U}_k)_{k=1}^K$  are incoherent, and the columns of  $\mathbf{Z}$   
 645 approximately lie on  $\bigcup_{k=1}^K \text{Span}(\mathbf{U}_k)$ . Let  $\gamma = \frac{p}{N\epsilon^2}$ . Let  $\kappa > 0$ . Then

$$\mathbf{Z} - \kappa \nabla_{\mathbf{Z}} R^c(\mathbf{Z} \mid \mathbf{U}_{[K]}) \approx (1 - \kappa\gamma) \mathbf{Z} + \kappa\gamma \text{MSSA}(\mathbf{Z} \mid \mathbf{U}_{[K]}), \quad (60)$$

646 where as in Section 2.3 we have

$$\text{SSA}(\mathbf{Z} \mid \mathbf{U}_k) = (\mathbf{U}_k^* \mathbf{Z}) \text{softmax}((\mathbf{U}_k^* \mathbf{Z})^* (\mathbf{U}_k^* \mathbf{Z})), \quad (61)$$

$$\text{MSSA}(\mathbf{Z} \mid \mathbf{U}_{[K]}) = \gamma [\mathbf{U}_1, \dots, \mathbf{U}_K] \begin{bmatrix} \text{SSA}(\mathbf{Z} \mid \mathbf{U}_1) \\ \vdots \\ \text{SSA}(\mathbf{Z} \mid \mathbf{U}_K) \end{bmatrix}, \quad (62)$$

647 where  $\text{softmax}(\cdot)$  is the softmax operator (applied to each column of an input matrix), i.e.,

$$\text{softmax}(\mathbf{v}) = \frac{1}{\sum_{i=1}^n e^{v_i}} \begin{bmatrix} e^{v_1} \\ \vdots \\ e^{v_n} \end{bmatrix}, \quad (63)$$

$$\text{softmax}([\mathbf{v}_1, \dots, \mathbf{v}_K]) = [\text{softmax}(\mathbf{v}_1), \dots, \text{softmax}(\mathbf{v}_K)]. \quad (64)$$

648 *Proof.* According to (9), the gradient  $\nabla_{\mathbf{Z}} R^c(\mathbf{Z}; \mathbf{U}_{[K]})$  is

$$\nabla_{\mathbf{Z}} R^c(\mathbf{Z}; \mathbf{U}_{[K]}) = \gamma \sum_{k=1}^K \mathbf{U}_k \mathbf{U}_k^* \mathbf{Z} (\mathbf{I} + \gamma (\mathbf{U}_k^* \mathbf{Z})^* (\mathbf{U}_k^* \mathbf{Z}))^{-1}. \quad (65)$$

649 Notice that according to [54], the gradient is precisely the residual of a ridge regression for each  
 650 (projected) token  $\mathbf{U}_k^* \mathbf{z}_i$  using other projected tokens  $\mathbf{U}_k^* \mathbf{z}_j$  as the regressors, hence being the residual  
 651 of an auto-regression.

652 However, as we have seen in the work of ReduNet [54], computing the inverse  
 653  $(\mathbf{I} + \gamma (\mathbf{U}_k^* \mathbf{Z})^* (\mathbf{U}_k^* \mathbf{Z}))^{-1}$  can be expensive. Hence for computational efficiency, we may approxi-  
 654 mate it with the first order term of its von Neumann expansion:

$$\nabla_{\mathbf{Z}} R^c(\mathbf{Z}; \mathbf{U}_{[K]}) = \gamma \sum_{k=1}^K \mathbf{U}_k \mathbf{U}_k^* \mathbf{Z} (\mathbf{I} + \gamma (\mathbf{U}_k^* \mathbf{Z})^* (\mathbf{U}_k^* \mathbf{Z}))^{-1} \quad (66)$$

$$\approx \gamma \sum_{k=1}^K \mathbf{U}_k \mathbf{U}_k^* \mathbf{Z} (\mathbf{I} - \gamma (\mathbf{U}_k^* \mathbf{Z})^* (\mathbf{U}_k^* \mathbf{Z})) \quad (67)$$

$$= \gamma \sum_{k=1}^K \mathbf{U}_k (\mathbf{U}_k^* \mathbf{Z} - \gamma \mathbf{U}_k^* \mathbf{Z} [(\mathbf{U}_k^* \mathbf{Z})^* (\mathbf{U}_k^* \mathbf{Z})]) \quad (68)$$

655 Notice that the term  $(\mathbf{U}_k^* \mathbf{Z})^* (\mathbf{U}_k^* \mathbf{Z})$  is the auto-correlation among the projected tokens. As the  
 656 tokens  $\mathbf{Z}$  may be from different subspaces, we would prefer to use only tokens that belong to the  
 657 *same* subspace to regress and compress themselves. Hence we may convert the above correlation  
 658 term into a subspace-membership indicator with a softmax operation, whence (68) becomes

$$\nabla_{\mathbf{Z}} R^c(\mathbf{Z}; \mathbf{U}_{[K]}) \approx \gamma \sum_{k=1}^K \mathbf{U}_k (\mathbf{U}_k^* \mathbf{Z} - \gamma \mathbf{U}_k^* \mathbf{Z} [(\mathbf{U}_k^* \mathbf{Z})^* (\mathbf{U}_k^* \mathbf{Z})]) \quad (69)$$

$$\approx \gamma \sum_{k=1}^K \mathbf{U}_k \mathbf{U}_k^* \mathbf{Z} - \gamma^2 \sum_{k=1}^K \mathbf{U}_k (\mathbf{U}_k^* \mathbf{Z} \text{softmax}((\mathbf{U}_k^* \mathbf{Z})^* (\mathbf{U}_k^* \mathbf{Z}))) \quad (70)$$

659 Then, we can rewrite the above approximation to the gradient of  $R^c$  as:

$$\nabla_{\mathbf{Z}} R^c(\mathbf{Z}; \mathbf{U}_{[K]}) \approx \gamma \sum_{k=1}^K \mathbf{U}_k \mathbf{U}_k^* \mathbf{Z} - \gamma^2 \sum_{k=1}^K \mathbf{U}_k (\mathbf{U}_k^* \mathbf{Z} \text{softmax}((\mathbf{U}_k^* \mathbf{Z})^* (\mathbf{U}_k^* \mathbf{Z}))) \quad (71)$$

$$= \gamma \sum_{k=1}^K \mathbf{U}_k \mathbf{U}_k^* \mathbf{Z} - \gamma^2 \sum_{k=1}^K \mathbf{U}_k \text{SSA}(\mathbf{Z} \mid \mathbf{U}_k) \quad (72)$$

$$= \underbrace{\left( \gamma \sum_{k=1}^K \mathbf{U}_k \mathbf{U}_k^* \right)}_{\approx \gamma \mathbf{Z}} \mathbf{Z} - \gamma^2 [\mathbf{U}_1, \dots, \mathbf{U}_K] \begin{bmatrix} \text{SSA}(\mathbf{Z} \mid \mathbf{U}_1) \\ \vdots \\ \text{SSA}(\mathbf{Z} \mid \mathbf{U}_K) \end{bmatrix} \quad (73)$$

$$\approx \gamma \mathbf{Z} - \gamma^2 [\mathbf{U}_1, \dots, \mathbf{U}_K] \begin{bmatrix} \text{SSA}(\mathbf{Z} \mid \mathbf{U}_1) \\ \vdots \\ \text{SSA}(\mathbf{Z} \mid \mathbf{U}_K) \end{bmatrix}. \quad (74)$$

660 Thus the gradient descent step with learning rate  $\kappa > 0$  gives

$$\mathbf{Z} - \kappa \nabla_{\mathbf{Z}} R^c(\mathbf{Z} \mid \mathbf{U}_{[K]}) \approx (1 - \kappa \gamma) \mathbf{Z} + \kappa \gamma^2 [\mathbf{U}_1, \dots, \mathbf{U}_K] \begin{bmatrix} \text{SSA}(\mathbf{Z} \mid \mathbf{U}_1) \\ \vdots \\ \text{SSA}(\mathbf{Z} \mid \mathbf{U}_K) \end{bmatrix}. \quad (75)$$

661

□

### 662 A.3 Companion to Section 2.4

663 We again wish to re-iterate the core contribution of our approach in Section 2.4.

- 664 • Within the framework of alternating minimization of the sparse rate reduction objective, we
- 665 show that the second alternating step — gradient descent on the overall coding rate plus a
- 666 sparse regularization term — has heuristic connections to a particular LASSO optimization.
- 667 • We show that the unrolling of the proximal gradient step to solve this LASSO optimization
- 668 resembles the MLP which immediately follows the self-attention layer within transformer
- 669 blocks.

670 In the main text, our connection between the second step of the alternating minimization and the  
671 LASSO optimization was high-level and heuristic. In some sense, the choice to pose the minimization  
672 step as a LASSO was a *simple, reliable, and interpretable choice* which works well in practice, but  
673 is nonetheless not backed up by rigorous theoretical justification. In the following subsection, we  
674 provide a mathematical justification for a reformulation of the minimization step using a majorization-  
675 minimization framework. We further show that the associated unrolled optimization step bears a  
676 strong resemblance to the ISTA step. This confirms our earlier discussion — we took the *simplest*  
677 *possible choice* in designing CRATE, but by more rigorous derivation we can uncover alternative  
678 operators which nonetheless have the same conceptual function and may perform better in practice.

679 **Assumptions.** In this section, we present a rigorous optimization analysis of an incremental  
680 minimization approach to the objective (13). We will show that under two simplifying assumptions,  
681 namely

- 682 1. The columns of  $\mathbf{Z}^{\ell+1/2}$  are normalized, in the sense that  $\text{diag}((\mathbf{Z}^{\ell+1/2})^* \mathbf{Z}^{\ell+1/2}) = \mathbf{1}$ ,<sup>10</sup>
- 683 2. We have  $d \geq N$ ,<sup>11</sup> and the columns of  $\mathbf{Z}^{\ell+1/2}$  are orthogonal, so that  $(\mathbf{Z}^{\ell+1/2})^* \mathbf{Z}^{\ell+1/2} =$   
684  $\mathbf{I}$ .<sup>12</sup>

685 the approach leads to an update iteration that is equal to a slightly simplified version of the ISTA  
686 block (16). We see this as a justification for our derivation in Section 2.4, which obtained the ISTA  
687 block by introducing an additional simplifying assumption on the distribution of the data at layer  $\ell$ .

688 **Analysis.** Following (15), we will consider the natural relaxation of the  $\ell_0$  “norm” to the  $\ell^1$  norm,  
689 and incorporate a nonnegativity constraint. Consider the objective

$$\varphi(\mathbf{Z}) = \lambda \|\mathbf{Z}\|_1 + \chi_{\{\mathbf{Z} \geq \mathbf{0}\}}(\mathbf{Z}) - \underbrace{\frac{1}{2} \log \det(\mathbf{I} + \alpha \mathbf{Z}^* \mathbf{Z})}_{R(\mathbf{Z})}, \quad (76)$$

690 where  $\mathbf{Z} \in \mathbb{R}^{d \times N}$  and  $\alpha = d/N\varepsilon^2$ , and  $\chi_{\{\mathbf{Z} \geq \mathbf{0}\}}$  denotes the characteristic function for the set of  
691 elementwise-nonnegative matrices  $\mathbf{Z}$ . As in Appendix A.2, we calculate

$$\nabla_{\mathbf{Z}} R(\mathbf{Z}) = \alpha \mathbf{Z} (\mathbf{I} + \alpha \mathbf{Z}^* \mathbf{Z})^{-1}. \quad (77)$$

692 We consider an incremental optimization scheme for the highly nonlinear and nonconvex objective  $\varphi$ .  
693 Following Section 2.3, we optimize locally at a “post-compression” iterate  $\mathbf{Z}^{\ell+1/2}$ . We follow the  
694 standard proximal majorize-minimize framework [69] for incremental/local optimization: this begins  
695 with the second-order Taylor expansion for the smooth part of  $\varphi$  in a neighborhood of the current

<sup>10</sup>This is a natural assumption in transformer-type architectures such as CRATE due to the use of LayerNorm blocks—although these blocks (indeed, as we use them in CRATE) include trainable mean and scale offsets as well as an additional mean subtraction operation [63], they are initialized to have zero mean and unit norm, hence this assumption corresponds to an analysis of the network at its initialization.

<sup>11</sup>This assumption is without loss of generality, as we will see in the analysis below. The reason is that  $\mathbf{Z}^* \mathbf{Z}$  and  $\mathbf{Z} \mathbf{Z}^*$  have the same nonzero eigenvalues regardless of the shape of  $\mathbf{Z}$ , which implies that  $\log \det(\mathbf{I} + \alpha \mathbf{Z}^* \mathbf{Z}) = \log \det(\mathbf{I} + \alpha \mathbf{Z} \mathbf{Z}^*)$ . In particular, interpreting the norms appropriately (with a slight abuse of notation), we have  $\varphi(\mathbf{Z}) = \varphi(\mathbf{Z}^*)$ , so for the purposes of analysis we can always proceed as though  $\mathbf{Z}$  is a tall matrix (as long as we do not use any special properties of  $\alpha$  in our derivation).

<sup>12</sup>This assumption is strictly stronger than the previous one, and strictly stronger than an assumption of incoherence on the columns. It corresponds to the representation  $\mathbf{Z}^{\ell+1/2}$  being non-collapsed, which we expect to hold at initialization due to the projections  $\mathbf{U}_{[K]}$  being random.

696 iterate  $\mathbf{Z}^{\ell+1/2}$ :

$$R(\mathbf{Z}) = R(\mathbf{Z}^{\ell+1/2}) + \left\langle \nabla_{\mathbf{Z}} R(\mathbf{Z}^{\ell+1/2}), \mathbf{Z} - \mathbf{Z}^{\ell+1/2} \right\rangle + \int_0^1 (1-t) \left\langle \mathbf{Z} - \mathbf{Z}^{\ell+1/2}, \nabla^2 R(\mathbf{Z}_t) (\mathbf{Z} - \mathbf{Z}^{\ell+1/2}) \right\rangle dt, \quad (78)$$

697 where for any  $\mathbf{Z} \in \mathbb{R}^{d \times N}$ ,  $\mathbf{Z}_t = t\mathbf{Z}^{\ell+1/2} + (1-t)\mathbf{Z}$ . The proximal majorization-minimization  
698 approach alternates two steps to minimize  $\varphi$ :

- 699 1. First, use assumptions on  $\mathbf{Z}^{\ell+1/2}$  to derive an upper bound on the operator norm of the  
700 Hessian  $\nabla^2 R(\mathbf{Z})$  over the effective domain of the optimization problem. We will write  $L$   
701 for this (uniform) upper bound. This yields a quadratic upper bound for the smooth part of  
702 the objective  $\varphi$ .
- 703 2. Then, alternately minimize the *smooth part* of the quadratic upper bound as a function of  $\mathbf{Z}$ ,  
704 and take a *proximal step* on the nonsmooth part. It can be shown [69] that corresponds to  
705 the iteration

$$\mathbf{Z}^+ = \text{prox}_{\frac{\lambda}{L}(\|\cdot\|_1 + \chi_{\{\mathbf{Z} \geq \mathbf{0}\}})} \left( \mathbf{Z} + \frac{1}{L} \nabla_{\mathbf{Z}} R(\mathbf{Z}) \right) \quad (79)$$

706 In the alternating minimization setting of this paper for optimizing (1), we only take one  
707 such step, starting at  $\mathbf{Z}^{\ell+1/2}$ .

708 We will instantiate this program below, showing quantitative error bounds related to our assumptions  
709 above as necessary. Rather than directly applying the iteration (79), we will derive it below under our  
710 aforementioned assumptions.

711 Starting at (78), our first task is to upper bound the quadratic residual. This corresponds to estimating

$$\left\langle \mathbf{Z} - \mathbf{Z}^{\ell+1/2}, \nabla^2 R(\mathbf{Z}_t) (\mathbf{Z} - \mathbf{Z}^{\ell+1/2}) \right\rangle \quad (80)$$

$$\leq \sup_{t \in [0,1]} \left\| \nabla^2 R(\mathbf{Z}_t) \right\|_{\ell^2 \rightarrow \ell^2} \left\| \mathbf{Z} - \mathbf{Z}^{\ell+1/2} \right\|_{\text{F}}^2 \quad (81)$$

712 with Cauchy-Schwarz. Using Lemma 5, we can estimate the operator norm term in the previous  
713 bound in terms of properties of  $\mathbf{Z}^{\ell+1/2}$ . We need to bound

$$\alpha \sup_{\|\Delta\|_{\text{F}} \leq 1} \left\| (\Delta - \alpha \mathbf{Z}_t (\mathbf{I} + \alpha \mathbf{Z}_t^* \mathbf{Z}_t)^{-1} (\mathbf{Z}_t^* \Delta + \Delta^* \mathbf{Z}_t)) (\mathbf{I} + \alpha \mathbf{Z}_t^* \mathbf{Z}_t)^{-1} \right\|_{\text{F}}, \quad (82)$$

714 and Lemma 6 gives that this term is no larger than  $9\alpha/4$  for any  $\mathbf{Z}$  and any  $t$ . With this estimate and  
715 (78), we have a quadratic upper bound for  $-R(\mathbf{Z})$ :

$$-R(\mathbf{Z}) \leq -R(\mathbf{Z}^{\ell+1/2}) + \left\langle -\nabla_{\mathbf{Z}} R(\mathbf{Z}^{\ell+1/2}), \mathbf{Z} - \mathbf{Z}^{\ell+1/2} \right\rangle + \frac{9\alpha}{8} \left\| \mathbf{Z} - \mathbf{Z}^{\ell+1/2} \right\|_{\text{F}}^2. \quad (83)$$

716 Meanwhile, by our assumptions above, we have

$$-\nabla_{\mathbf{Z}} R(\mathbf{Z}^{\ell+1/2}) = -\alpha \mathbf{Z}^{\ell+1/2} (\mathbf{I} + \alpha \mathbf{I})^{-1} = -\frac{\alpha}{1+\alpha} \mathbf{Z}^{\ell+1/2}. \quad (84)$$

717 We now minimize the preceding quadratic upper bound as a function of  $\mathbf{Z}$ . Differentiating, the  
718 minimizer  $\mathbf{Z}_{\text{opt}}$  is calculated as

$$\mathbf{Z}_{\text{opt}} = \left( 1 + \frac{4}{9(1+\alpha)} \right) \mathbf{Z}^{\ell+1/2}, \quad (85)$$

719 and it is well-known that the proximal operator of the sum of  $\chi_{\{\mathbf{Z} \geq \mathbf{0}\}}$  and  $\lambda \|\cdot\|_1$  is simply the  
720 one-sided soft-thresholding operator [69]

$$\text{prox}_{\chi_{\{\mathbf{Z} \geq \mathbf{0}\}} + \lambda \|\cdot\|_1}(\mathbf{Z}) = \max\{\mathbf{Z} - \lambda \mathbf{1}, \mathbf{0}\}, \quad (86)$$

721 where the maximum is applied elementwise. As in Section 2.4, we may write this elementwise  
722 maximum simply as ReLU. Thus, one step of proximal majorization-minimization under our  
723 simplifying assumptions takes the form

$$\mathbf{Z}^{\ell+1} = \text{ReLU} \left( \left( 1 + \frac{4}{9(1+\alpha)} \right) \mathbf{Z}^{\ell+1/2} - \frac{4\lambda}{9\alpha} \mathbf{1} \right). \quad (87)$$

Finally, we point out one additional elaboration which introduces the dictionary  $\mathbf{D}$  that appears in the ISTA block in Section 2.4. Notice that for any orthogonal  $\mathbf{D}$ , one has  $R(\mathbf{D}\mathbf{Z}) = R(\mathbf{Z})$  for every  $\mathbf{Z}$ . This symmetry implies equivariance properties of  $\nabla_{\mathbf{Z}}R(\mathbf{Z})$  and  $\nabla_{\mathbf{Z}}^2R(\mathbf{Z})$ : for every  $\mathbf{Z}$  and every  $\Delta$  and every orthogonal  $\mathbf{D}$ ,

$$\mathbf{D}\nabla_{\mathbf{Z}}R(\mathbf{Z}) = \nabla_{\mathbf{Z}}R(\mathbf{D}\mathbf{Z}), \quad (88)$$

$$\langle \mathbf{D}\Delta, \nabla_{\mathbf{Z}}^2R(\mathbf{Z})(\mathbf{D}\Delta) \rangle = \langle \Delta, \nabla_{\mathbf{Z}}^2R(\mathbf{D}\mathbf{Z})(\Delta) \rangle. \quad (89)$$

Hence the quadratic Taylor expansion (78) can be written equivalently as

$$\begin{aligned} R(\mathbf{Z}) &= R(\mathbf{D}^*\mathbf{Z}^{\ell+1/2}) + \left\langle \nabla_{\mathbf{Z}}R(\mathbf{D}^*\mathbf{Z}^{\ell+1/2}), \mathbf{Z} - \mathbf{Z}^{\ell+1/2} \right\rangle \\ &\quad + \int_0^1 (1-t) \left\langle \mathbf{Z} - \mathbf{Z}^{\ell+1/2}, \nabla^2R(\mathbf{D}^*\mathbf{Z}_t) (\mathbf{Z} - \mathbf{Z}^{\ell+1/2}) \right\rangle dt, \end{aligned} \quad (90)$$

for any orthogonal  $\mathbf{D}$ . The significance of this is that we have obtained an expression equivalent to (78), but with  $\mathbf{Z}^{\ell+1/2}$  replaced by  $\mathbf{D}^*\mathbf{Z}^{\ell+1/2}$ ; moreover, because our approximation arguments above are not affected by left-multiplication of  $\mathbf{Z}^{\ell+1/2}$  by an orthogonal matrix (this operation does not change the norms of the columns of  $\mathbf{Z}^{\ell+1/2}$ , or their correlations, and hence the matrix's incoherence), we can apply exactly the same line of reasoning above to obtain that an equivalent proximal majorization-minimization iteration is given by

$$\mathbf{Z}^{\ell+1} = \text{ReLU} \left( \left( 1 + \frac{4}{9(1+\alpha)} \right) \mathbf{D}^*\mathbf{Z}^{\ell+1/2} - \frac{4\lambda}{9\alpha} \mathbf{1} \right), \quad (91)$$

for any orthogonal dictionary  $\mathbf{D}$ . This gives an update quite similar to the ISTA block (16) in the case where the dictionary used in Section 2.4 is orthogonal, but without a skip connection.

We thus obtain a natural white-box version of this part of the architecture, along with the natural interpretation *that its purpose is to sparsify the compressed tokens  $\mathbf{Z}^{\ell+1/2}$  in a (learnable) dictionary*, which accords with recent empirical studies [75].

**Other architectures?** As we mentioned at the start of this section, the preceding derivation is performed in the most elementary possible setting in order to demonstrate the majorization-minimization approach for layer design. More precise approximations or assumptions may lead to superior layer designs that better optimize the target objective (1) (and in particular (13)). We mention two here:

1. **Beyond exactly-incoherent features:** our derivations above assumed that the incoming representations  $\mathbf{Z}^{\ell+1/2}$  were already maximal for the expansion term  $R$  in (13). It is desirable to obtain a ‘perturbative’ derivation, which applies in cases where  $\mathbf{Z}^{\ell+1/2}$  is not fully orthogonal, but instead near-orthogonal, in particular *incoherent* [69]. The derivations above can be adapted to this setting; the perturbation bounds become slightly more delicate, and the ultimate layer (91) changes to involve additional normalization.
2. **Beyond orthogonal dictionaries:** The symmetries of the expansion term  $R$  in (13) may be followed to lead to a pair of dictionaries  $\mathbf{D}$  and  $\mathbf{D}'$  and an objective that sparsifies  $\mathbf{D}\mathbf{Z}\mathbf{D}'$ . This type of transformation is suggestive of popular architectures that mix over tokens [53, 66], however we consider the simpler form  $\mathbf{D}\mathbf{Z}$  in this work. In addition, we have focused for simplicity on orthogonal dictionaries  $\mathbf{D}$ ; as in the previous bullet, one may consider in a similar way dictionaries  $\mathbf{D}$  which are complete and near-orthogonal. Adapting the derivation to *overcomplete dictionaries* is an interesting future direction that we expect to improve the scalability of CRATE; one avenue to achieve this could be increasing the number of projections  $\mathbf{U}_{[K]}$  and their embedding dimensions.

### A.3.1 Auxiliary Lemmas

**Lemma 5.** *Consider the function*

$$R(\mathbf{Z}) = \frac{1}{2} \log \det (\mathbf{I} + \alpha \mathbf{Z}^* \mathbf{Z}), \quad (92)$$

where  $\alpha > 0$  is a constant. Then we have

$$\nabla_{\mathbf{Z}}R(\mathbf{Z}) = \alpha \mathbf{Z} (\mathbf{I} + \alpha \mathbf{Z}^* \mathbf{Z})^{-1}, \quad (93)$$

763 and the Hessian operator  $\nabla_Z^2 R(Z) : \mathbb{R}^{d \times N} \rightarrow \mathbb{R}^{d \times N}$  satisfies that for any  $\Delta \in \mathbb{R}^{d \times N}$ ,

$$\nabla_Z^2 R(Z)(\Delta) \quad (94)$$

$$= \alpha \Delta (I + \alpha Z^* Z)^{-1} - \alpha^2 Z (I + \alpha Z^* Z)^{-1} (Z^* \Delta + \Delta^* Z) (I + \alpha Z^* Z)^{-1}. \quad (95)$$

764 *Proof.* The gradient calculation follows from [46], for example. For the Hessian, we use the usual  
765 approach to calculating derivatives: if  $\Delta$  is any matrix with the same shape as  $Z$  and  $t > 0$ ,

$$\nabla_Z^2 R(Z)(\Delta) = \left. \frac{\partial}{\partial t} \right|_{t=0} [t \mapsto \nabla_Z R(Z + t\Delta)], \quad (96)$$

766 valid since  $R$  is smooth. We have

$$\begin{aligned} & \nabla_Z R(Z + t\Delta) \\ &= \alpha(Z + t\Delta) (I + \alpha(Z + t\Delta)^*(Z + t\Delta))^{-1} \\ &= \alpha(Z + t\Delta) (I + \alpha Z^* Z + \alpha t [Z^* \Delta + \Delta^* Z + t \Delta^* \Delta])^{-1} \\ &= \alpha(Z + t\Delta) \left( I + \alpha t (I + \alpha Z^* Z)^{-1} [Z^* \Delta + \Delta^* Z + t \Delta^* \Delta] \right)^{-1} (I + \alpha Z^* Z)^{-1} \\ &= \alpha(Z + t\Delta) \left( \sum_{k=0}^{\infty} (-\alpha t)^k \left( (I + \alpha Z^* Z)^{-1} [Z^* \Delta + \Delta^* Z + t \Delta^* \Delta] \right)^k \right) (I + \alpha Z^* Z)^{-1}, \end{aligned}$$

767 where in the fourth line we require that  $t$  is sufficiently close to 0 in order to invoke the Neumann  
768 series. First, notice that the term involving  $\Delta^* \Delta$  does not play a role in the final expression: after  
769 we differentiate with respect to  $t$  and take a limit  $t \rightarrow 0$ , terms arising due to differentiation of  
770  $t \mapsto t \Delta^* \Delta$  go to zero, because whenever the summation index  $k > 0$  we have a term  $(-\alpha t)^k$  that  
771 goes to zero as  $t \rightarrow 0$ . We thus obtain with the product rule

$$\left. \frac{\partial}{\partial t} \right|_{t=0} [t \mapsto \nabla_Z R(Z + t\Delta)] \quad (97)$$

$$= \alpha \Delta (I + \alpha Z^* Z)^{-1} - \alpha^2 Z (I + \alpha Z^* Z)^{-1} (Z^* \Delta + \Delta^* Z) (I + \alpha Z^* Z)^{-1}. \quad (98)$$

772

□

773 **Lemma 6.** *One has*

$$\sup_{\|\Delta\|_F \leq 1} \left\| (\Delta - \alpha Z_t (I + \alpha Z_t^* Z_t)^{-1} (Z_t^* \Delta + \Delta^* Z_t)) (I + \alpha Z_t^* Z_t)^{-1} \right\|_F \leq \frac{9}{4}. \quad (99)$$

774 *Proof.* Fix  $\Delta$  satisfying  $\|\Delta\|_F \leq 1$ . By the triangle inequality,

$$\left\| (\Delta - \alpha Z_t (I + \alpha Z_t^* Z_t)^{-1} (Z_t^* \Delta + \Delta^* Z_t)) (I + \alpha Z_t^* Z_t)^{-1} \right\|_F \quad (100)$$

$$\leq \left\| \Delta (I + \alpha Z_t^* Z_t)^{-1} \right\|_F + \alpha \left\| Z_t (I + \alpha Z_t^* Z_t)^{-1} (Z_t^* \Delta + \Delta^* Z_t) (I + \alpha Z_t^* Z_t)^{-1} \right\|_F. \quad (101)$$

775 For the first term, we note that

$$\left\| \Delta (I + \alpha Z_t^* Z_t)^{-1} \right\|_F = \left\| ((I + \alpha Z_t^* Z_t)^{-1} \otimes I) \text{vec}(\Delta) \right\|_F, \quad (102)$$

776 and since  $(I + \alpha Z_t^* Z_t)^{-1} \preceq I$ , we obtain from Cauchy-Schwarz<sup>13</sup>

$$\left\| \Delta (I + \alpha Z_t^* Z_t)^{-1} \right\|_F \leq \|\Delta\|_F. \quad (103)$$

777 We can use a similar idea to control the second term. We have from the triangle inequality

$$\left\| Z_t (I + \alpha Z_t^* Z_t)^{-1} (Z_t^* \Delta + \Delta^* Z_t) (I + \alpha Z_t^* Z_t)^{-1} \right\|_F \quad (104)$$

$$\leq \left\| Z_t (I + \alpha Z_t^* Z_t)^{-1} Z_t^* \Delta (I + \alpha Z_t^* Z_t)^{-1} \right\|_F \quad (105)$$

$$+ \left\| (I + \alpha Z_t^* Z_t)^{-1} Z_t^* \Delta (I + \alpha Z_t^* Z_t)^{-1} Z_t^* \right\|_F. \quad (106)$$

<sup>13</sup>Recall that the eigenvalues of a Kronecker product of symmetric matrices are the tensor product of the eigenvalues (with multiplicity).

778 For the first term, we have

$$\|Z_t(I + \alpha Z_t^* Z_t)^{-1} Z_t^* \Delta (I + \alpha Z_t^* Z_t)^{-1}\|_F \quad (107)$$

$$= \|((I + \alpha Z_t^* Z_t)^{-1} \otimes Z_t(I + \alpha Z_t^* Z_t)^{-1} Z_t^*) \text{vec}(\Delta)\|_F \quad (108)$$

$$\leq \sigma_{\max}((I + \alpha Z_t^* Z_t)^{-1}) \sigma_{\max}(Z_t(I + \alpha Z_t^* Z_t)^{-1} Z_t^*) \|\Delta\|_F \quad (109)$$

$$\leq \frac{1}{\alpha} \|\Delta\|_F. \quad (110)$$

779 The last estimate follows from a computation using the SVD of  $Z_t$ . Meanwhile, we have for the  
 780 second term by a similar argument (using the fact that the singular values of  $A$  and  $A^*$  are identical  
 781 for any matrix  $A$ )

$$\|(I + \alpha Z_t^* Z_t)^{-1} Z_t^* \Delta (I + \alpha Z_t^* Z_t)^{-1} Z_t^*\|_F \leq \sigma_{\max}((I + \alpha Z_t^* Z_t)^{-1} Z_t^*)^2 \|\Delta\|_F \quad (111)$$

$$\leq \frac{1}{4\alpha} \|\Delta\|_F, \quad (112)$$

782 where once again the estimate follows from a computation involving the SVD of  $Z_t$  (together with  
 783 the fact that the function  $\sigma \mapsto \sigma/(1 + \alpha\sigma^2)$  is bounded on  $\sigma \geq 0$  by  $1/(2\sqrt{\alpha})$ ). Putting it together,  
 784 we have obtained

$$\|(\Delta - \alpha Z_t(I + \alpha Z_t^* Z_t)^{-1}(Z_t^* \Delta + \Delta^* Z_t))(I + \alpha Z_t^* Z_t)^{-1}\|_F \leq \frac{9}{4} \|\Delta\|_F, \quad (113)$$

785 which gives the claim after taking suprema.

786

□

## B Additional Experiments and Details

In this section, we provide details about our experiments, and report the results of additional experiments that were not covered in the main text. CRATE takes arguably the most basic design choices possible, and so we do *not* attempt to directly compete with state-of-the-art performance from heavily engineered and empirically designed transformers. The results of our experiments are meant to convey a few core messages:

- *Despite not being engineered to compete with the state-of-the-art, CRATE performs strongly on large-scale real-world datasets*, including classification on ImageNet-1K. CRATE also achieves strong transfer learning performance.
- *Because our model is designed through unrolled optimization of a well-understood objective, each layer is interpretable*. In particular, we can analyze the performance of CRATE, as well as design network modifications, on a *layer-wise basis*. This is powered by an arguably unparalleled level of insight into the role of each operator in our network.
- *We make the simplest possible choices during the design of CRATE, but these can be changed easily while keeping the same framework*. We study a few modifications later in this section (Appendix B.4) and show that they do not significantly hurt empirical performance, but emphasize here that there is significant potential for improvement with different architecture choices (and in particular a different theoretical analysis).

### B.1 Implementation details

In this subsection, we provide more details for implementing CRATE on vision tasks.

#### B.1.1 Architecture of CRATE

**Architectural modifications.** Compared to the conceptual architecture proposed in Sections 2.5 and 3, we make the following change for the sake of implementation simplicity:

- In the compression step, replace the term  $\frac{p}{N\epsilon^2} [U_1, \dots, U_K]$  in the MSSA operator with another trainable parameter  $\mathbf{W} \in \mathbb{R}^{d \times pK}$ . Thus the MSSA block becomes

$$\text{MSSA}(\mathbf{Z} \mid \mathbf{U}_{[K]}, \mathbf{W}) \doteq \mathbf{W} \begin{bmatrix} \text{SSA}(\mathbf{Z} \mid \mathbf{U}_1) \\ \vdots \\ \text{SSA}(\mathbf{Z} \mid \mathbf{U}_K) \end{bmatrix}. \quad (114)$$

**PyTorch code for CRATE.** We provide PyTorch-style code for implementing our proposed network architecture. Algorithm 1 defines the overall architecture, Algorithm 2 and Algorithm 3 contain details for the transformer block, self-attention block (MSSA-block), and MLP block (ISTA-block).

#### B.1.2 Training Setup

**Pre-training on ImageNet-1K.** We apply the Lion optimizer [71] for pre-training both CRATE and ViT models. We configure the learning rate as  $2.4 \times 10^{-4}$ , weight decay as 0.5, and batch size as 2,048. We incorporate a warm-up strategy with a linear increase over 5 epochs, followed by training the models for a total of 150 epochs with cosine decay. For data augmentation, we only apply the standard techniques, random cropping and random horizontal flipping, on the ImageNet-1K dataset. We apply label smoothing with smoothing parameter 0.1. One training epoch of CRATE-Base takes around 240 seconds using 16 A100 40GB GPUs.

**Fine-tuning.** We fine-tune our pre-trained CRATE and ViT models on the following target datasets: CIFAR10/CIFAR100 [10], Oxford Flowers-102 [7], Oxford-IIIT-Pets [16]. We also evaluate our pre-trained models on the commonly used ImageNet Real [36] benchmark. For each fine-tuning task, we use the AdamW optimizer [26]. We configure the learning rate as  $5 \times 10^{-5}$ , weight decay as 0.01, and batch size to be 512. To allow transfer learning, we first resize our input data to 224. For data augmentations, we also adopt several standard techniques: random cropping, random horizontal flipping, and random augmentation (with number of transformations  $n = 2$  and magnitude of transformations  $m = 14$ ).<sup>14</sup>

<sup>14</sup>[https://github.com/huggingface/pytorch-image-models/blob/main/timm/data/auto\\_augment.py](https://github.com/huggingface/pytorch-image-models/blob/main/timm/data/auto_augment.py)

---

**Algorithm 1:** PyTorch-style pseudocode for CRATENetwork

---

# Class ViT\_dictionary definition

CRATE:

```
# initialization
def init(self, image_size, patch_size, num_classes, dim, depth, heads,
        mlp_dim, pool = 'cls', channels = 3, dim_head = 64, dropout = 0.,
        emb_dropout = 0.):
    # define patch, image dimensions and number of patches
    image_height, image_width = pair(image_size)
    patch_height, patch_width = pair(patch_size)
    num_patches = (image_height // patch_height) * (image_width //
        patch_width)
    patch_dim = channels * patch_height * patch_width

    # define patch embedding, positional embedding, dropout, and transformer
    self.to_patch_embedding = Sequential(Rearrange, LayerNorm(patch_dim),
        Linear(patch_dim, dim), LayerNorm(dim))
    self.pos_embedding = Parameter(random(1, num_patches + 1, dim))
    self.cls_token = Parameter(random(1, 1, dim))
    self.dropout = Dropout(emb_dropout)
    self.transformer = Transformer(dim, depth, heads, dim_head, mlp_dim,
        dropout)

    # define pooling, latent layer, and MLP head
    self.pool = pool
    self.to_latent = Identity()
    self.mlp_head = Sequential(LayerNorm(dim), Linear(dim, num_classes))

# forward pass
def forward(self, img):
    x = self.to_patch_embedding(img)
    b, n, _ = shape(x)
    cls_tokens = repeat(self.cls_token, '1 1 d -> b 1 d', b = b)
    x = concatenate((cls_tokens, x), dim=1)
    x += self.pos_embedding[:, :(n + 1)]
    x = self.dropout(x)
    x = self.transformer(x)
    x = mean(x, dim = 1) if self.pool == 'mean' else x[:, 0]
    x = self.to_latent(x)
    return self.mlp_head(x)
```

---

---

**Algorithm 2:** Pytorch Style Pseudocode for Transformer Block in CRATE

---

# Class Transformer definition

class Transformer:

```
# initialization
def init(self, dim, depth, heads, dim_head, mlp_dim, dropout = 0.):
    # define layers
    self.layers = []
    self.depth = depth
    for _ in range(depth):
        self.layers.append([LayerNorm(dim, Attention(dim, heads, dim_head,
            dropout))])
        self.layers.append([LayerNorm(dim, FeedForward(dim, mlp_dim,
            dropout))])

# forward pass
def forward(self, x):
    for attn, ff in self.layers:
        x_ = attn(x) + x
        x = ff(x_)
    return x
```

---

---

**Algorithm 3:** Pseudocode for Attention and FeedForward

---

```
# Class FeedForward definition
class FeedForward:
    # initialization
    def init(self, dim, hidden_dim, dropout = 0., step_size=0.1, lambd=0.1):
        self.weight = Parameter(Tensor(dim, dim))
        init.kaiming_uniform_(self.weight)
        self.step_size = step_size
        self.lambd = lambd
    # forward pass
    def forward(self, x):
        x1 = linear(x, self.weight, bias=None)
        grad_1 = linear(x1, self.weight.t(), bias=None)
        grad_2 = linear(x, self.weight.t(), bias=None)
        grad_update = self.step_size * (grad_2 - grad_1) - self.step_size *
            self.lambd
        output = relu(x + grad_update)
        return output

# Class Attention definition
class Attention:
    # initialization
    def init(self, dim, heads = 8, dim_head = 64, dropout = 0.):
        inner_dim = dim_head * heads
        project_out = not (heads == 1 and dim_head == dim)
        self.heads = heads
        self.scale = dim_head ** -0.5
        self.attend = Softmax(dim = -1)
        self.dropout = Dropout(dropout)
        self.qkv = Linear(dim, inner_dim, bias=False)
        self.to_out = Sequential(Linear(inner_dim, dim), Dropout(dropout)) if
            project_out else nn.Identity()
    # forward pass
    def forward(self, x):
        w = rearrange(self.qkv(x), 'b n (h d) -> b h n d', h = self.heads)
        dots = matmul(w, w.transpose(-1, -2)) * self.scale
        attn = self.attend(dots)
        attn = self.dropout(attn)
        out = matmul(attn, w)
        out = rearrange(out, 'b h n d -> b n (h d)')
        return self.to_out(out)
```

---

## 831 B.2 Experimental Results

832 In this subsection, we provide additional experimental results on CRATE, including layer-wise  
833 measurements, visualizations, as well as ablation studies.

### 834 B.2.1 Layer-wise Evaluation and Visualization

835 **Layer-wise evaluation of compression and sparsity.** Similar to Figure 3, we conduct the layer-  
836 wise evaluation of compression term and sparsity for CRATE-Tiny, CRATE-Base, and CRATE-Large.  
837 We observe similar behavior as mentioned in Section 3.1: both the compression term and the sparsity  
838 term improves as the layer index increases.

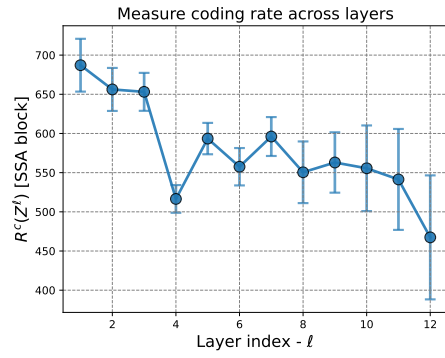

(a) Compression (Model: CRATE-Tiny).

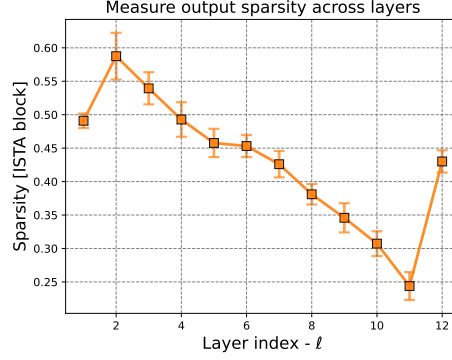

(b) Sparsity (Model: CRATE-Tiny).

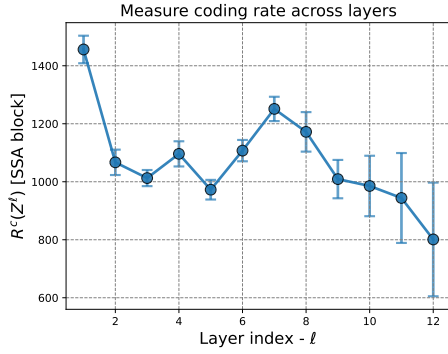

(c) Compression (Model: CRATE-Base).

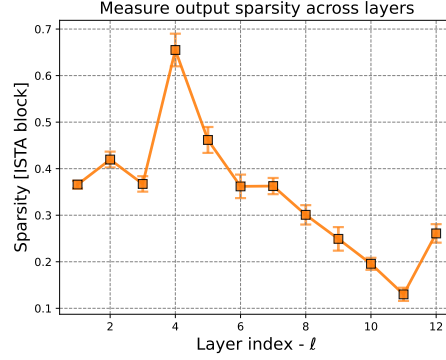

(d) Sparsity (Model: CRATE-Base).

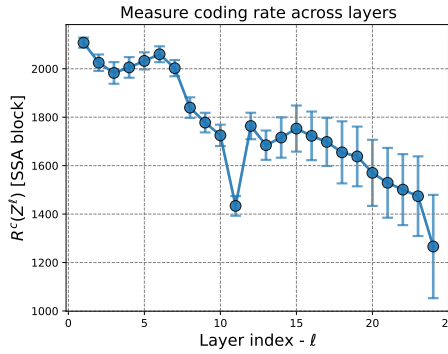

(e) Compression (Model: CRATE-Large).

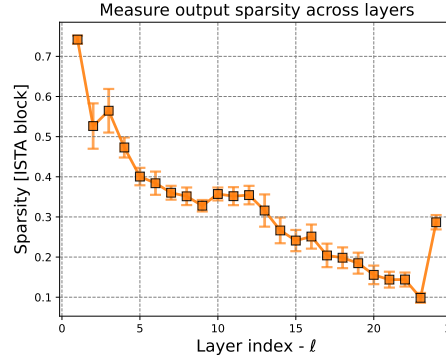

(f) Sparsity (Model: CRATE-Large).

**Figure 5:** *Left:* The compression term  $R^c(Z^{\ell+1/2})$  of the MSSA outputs at different layers. *Right:* the sparsity of the ISTA output block,  $\|Z^{\ell+1}\|_0/(d \cdot N)$ , at different layers.

839 **Visualizing layer-wise token representations.** In Figure 6, we visualize the token representations  
840  $\mathbf{Z}^\ell$  at different layers  $\ell \in \{1, \dots, 12\}$ . We provide more results evaluated on other samples in  
841 Appendix B.2.2.

842 **Visualizing layer-wise subspaces in multi-head self-attention.** We provide the visualization of  
843  $\mathbf{U}_{[K]}^\ell$  in Figure 7.

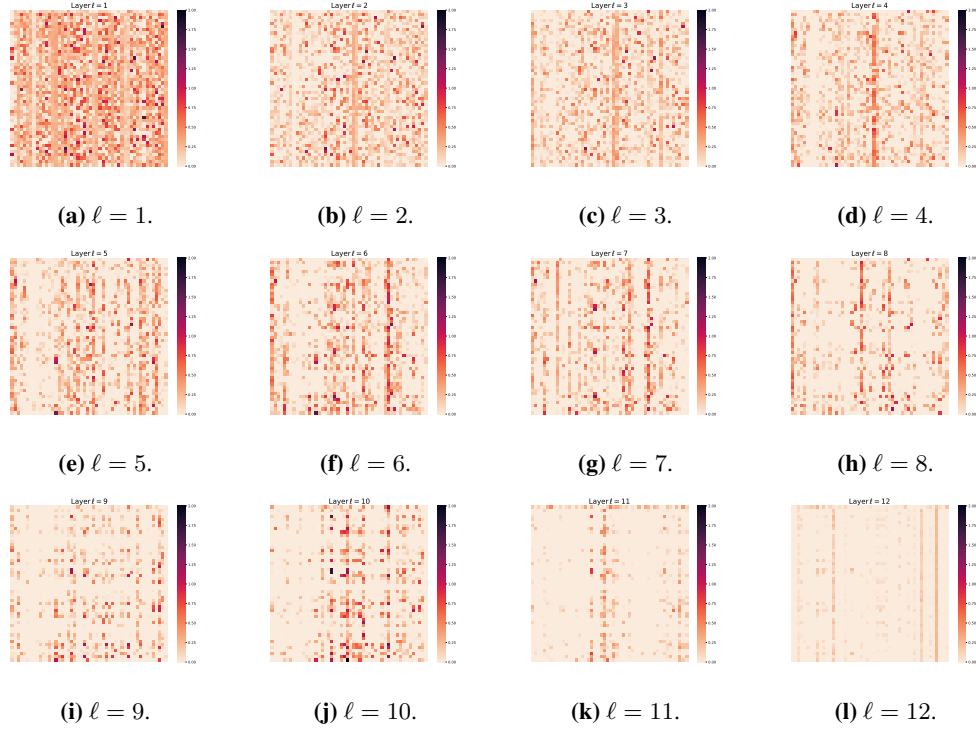

**Figure 6:** Visualizing layer-wise token  $\mathbf{Z}^\ell$  representations at each layer  $\ell$ . To enhance the visual clarity, we randomly extract a  $50 \times 50$  sub-matrix from  $\mathbf{Z}^\ell$  for display purposes. (Model: CRATE-Tiny)

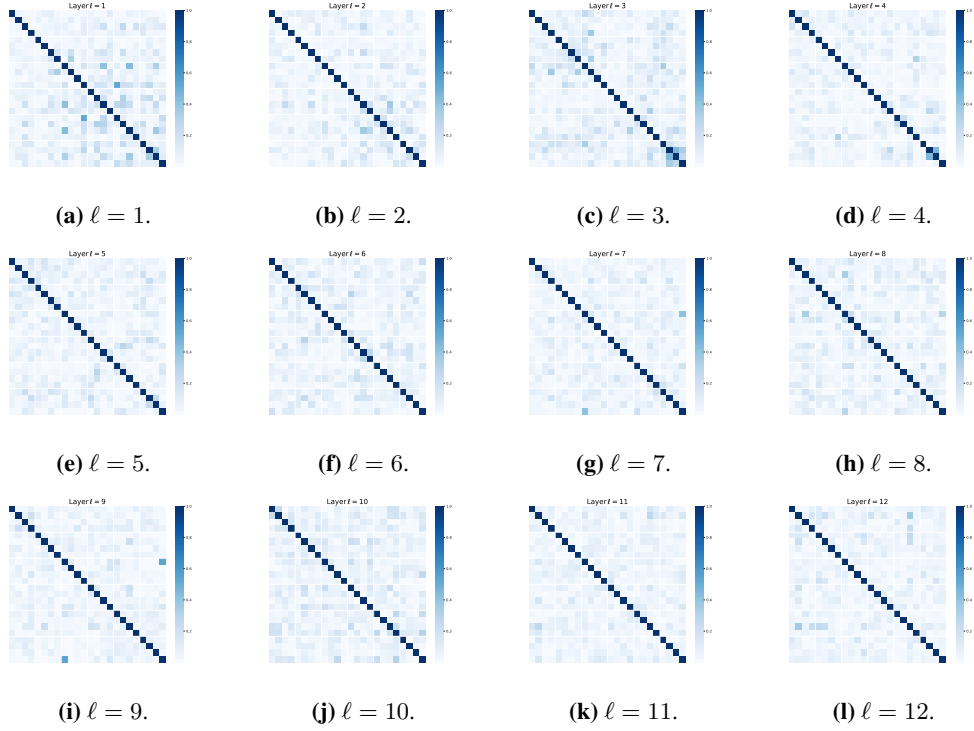

**Figure 7:** We visualize the  $[U_1^\ell, \dots, U_K^\ell]^* [U_1^\ell, \dots, U_K^\ell] \in \mathbb{R}^{pK \times pK}$  at different layers. The  $(i, j)$ -th block in each sub-figure corresponds to  $(U_i^\ell)^* U_j^\ell$  for  $i, j \in [K]$  at a particular layer  $\ell$ . To enhance the visual clarity, for each subspace  $U_i$ , we randomly pick 4 directions for display purposes. (Model: CRATE-Tiny)

## 844 B.2.2 Additional Layer-wise Visualization

845 We provide more results of the layer-wise token representation visualization on other samples in  
 846 Figure 8, Figure 9, Figure 10, and Figure 11 (Model: CRATE-Base).

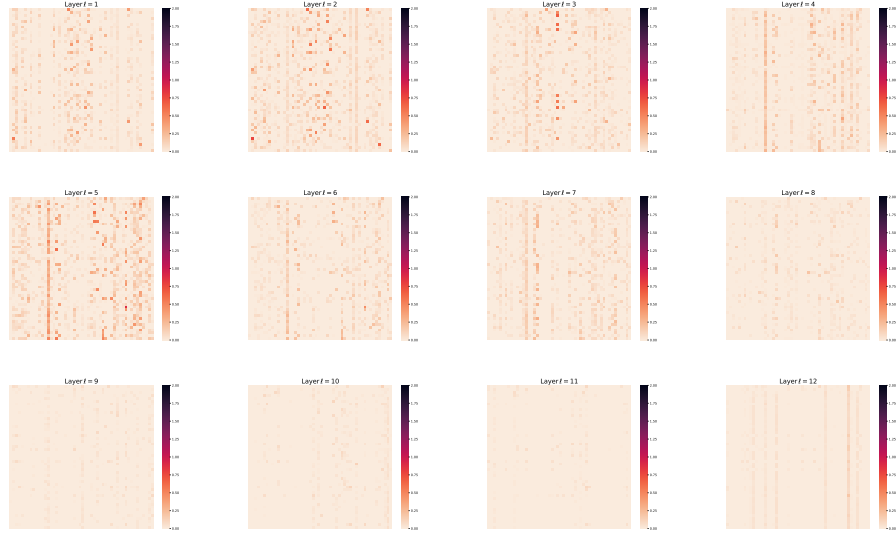

**Figure 8:** Visualizing layer-wise token  $Z^\ell$  representations at each layer  $\ell$ . To enhance the visual clarity, we randomly extract a  $50 \times 50$  sub-matrix from  $Z^\ell$  for display purposes. (*Sample 1*)

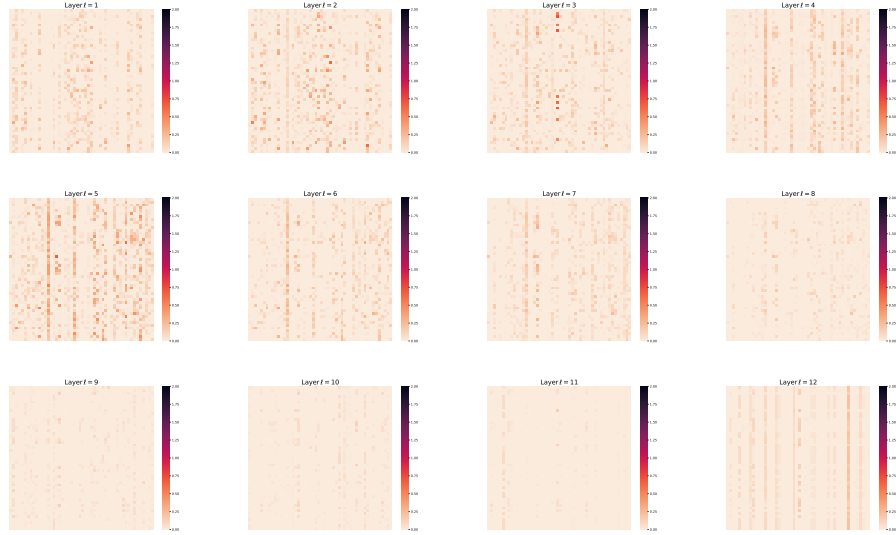

**Figure 9:** Visualizing layer-wise token  $Z^\ell$  representations at each layer  $\ell$ . To enhance the visual clarity, we randomly extract a  $50 \times 50$  sub-matrix from  $Z^\ell$  for display purposes. (*Sample 2*)

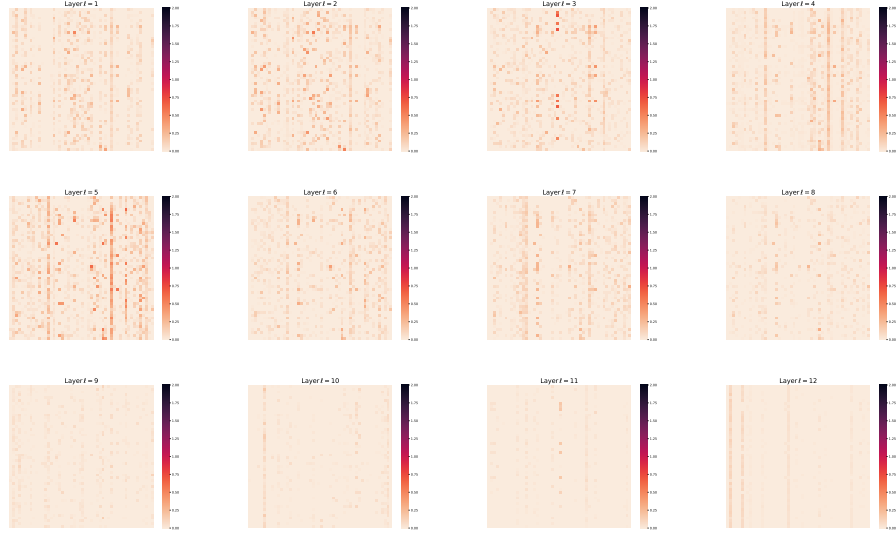

**Figure 10:** Visualizing layer-wise token  $Z^\ell$  representations at each layer  $\ell$ . To enhance the visual clarity, we randomly extract a  $50 \times 50$  sub-matrix from  $Z^\ell$  for display purposes. (*Sample 3*)

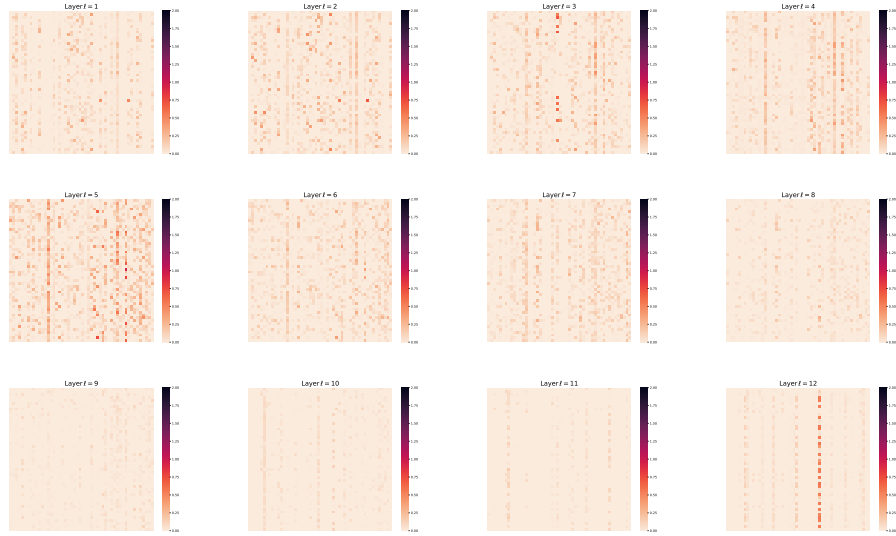

**Figure 11:** Visualizing layer-wise token  $Z^\ell$  representations at each layer  $\ell$ . To enhance the visual clarity, we randomly extract a  $50 \times 50$  sub-matrix from  $Z^\ell$  for display purposes. (*Sample 4*)

### B.3 CRATE Ablation

**Hyperparameters of CRATE.** In Table 2, we present evaluation of CRATE trained with various parameters. More specifically, we investigate the effect of number of epochs, weight decay, learning rate, step size ( $\eta$ ) and the regularization term ( $\lambda$ ) in ISTA block. As shown in Table 2, CRATE demonstrates consistently satisfactory performance across a diverse range of hyperparameters.

**Table 2:** Top 1 accuracy of CRATE on various datasets with different architecture design variants when trained on ImageNet.

| Model   | epoch         | weight decay  | lr                   | $\eta$ (ISTA) | $\lambda$ (ISTA) | ImageNet |
|---------|---------------|---------------|----------------------|---------------|------------------|----------|
| CRATE-B | 150 (default) | 0.5 (default) | $2.4 \times 10^{-4}$ | 0.1           | 0.1              | 70.8     |
| CRATE-B | 150           | 0.5           | $2.4 \times 10^{-4}$ | 0.02          | 0.1              | 70.7     |
| CRATE-B | 150           | 0.5           | $2.4 \times 10^{-4}$ | 0.5           | 0.1              | 66.7     |
| CRATE-B | 150           | 0.5           | $2.4 \times 10^{-4}$ | 0.1           | 0.02             | 70.8     |
| CRATE-B | 150           | 0.5           | $2.4 \times 10^{-4}$ | 0.1           | 0.5              | 70.5     |
| CRATE-B | 90            | 0.5           | $2.4 \times 10^{-4}$ | 0.1           | 0.1              | 69.5     |
| CRATE-B | 300           | 0.5           | $2.4 \times 10^{-4}$ | 0.1           | 0.1              | 70.9     |
| CRATE-B | 150           | 1.0           | $2.4 \times 10^{-4}$ | 0.1           | 0.1              | 70.3     |
| CRATE-B | 150           | 0.05          | $2.4 \times 10^{-4}$ | 0.1           | 0.1              | 70.2     |
| CRATE-B | 150           | 0.5           | $4.8 \times 10^{-4}$ | 0.1           | 0.1              | 70.2     |
| CRATE-B | 150           | 0.5           | $1.2 \times 10^{-4}$ | 0.1           | 0.1              | 70.3     |

### B.4 Exploring Architecture Variants

In this section, we explore the two following alternative architectures. One architecture involves a modification to the attention mechanism, while the other involves a modification to the sparsification mechanism. Again, we re-emphasize that these choices, although principled, are entirely modular and the choices we make here still lead to very simple architectures. A more sophisticated analysis may lead to different, more complicated architectures that perform better in practice. The architectures we experiment with are:

- Compression-inspired attention mechanism: revert the change in (114). That is, the attention mechanism implements (11) and (12) directly.
- Majorization-minimization proximal step sparsification: instead of (16), implement (91).

We obtain the following classification results in Table 3. After conducting additional simplifications to the network architecture (i.e., imposing additional constraints to the network architecture design), we discover that CRATE maintains reasonable performance on ImageNet-1K.

**Table 3:** Top 1 accuracy of CRATE on various datasets with different architecture design variants when trained on ImageNet.

| Model   | MSSA-block        | ISTA-block | ImageNet |
|---------|-------------------|------------|----------|
| CRATE-B | default           | default    | 70.8     |
| CRATE-B | Eq. (11) and (12) | default    | 63.3     |
| CRATE-B | default           | Eq. (91)   | 68.6     |
